# Supplementary material
Source: PubMed Central journal article supplement (PMC6823329)
Supplement: 10815_2019_1547_MOESM3_ESM.pdf [file 10815_2019_1547_MOESM3_ESM.pdf]

## Data Files In View

| File Label                                 | File Name                                  |
|--------------------------------------------|--------------------------------------------|
| P1_(CytoScan750K_Array).cy750K.cychp       | P1_(CytoScan750K_Array).cy750K.cychp       |
| P2_(CytoScan750K_Array).cy750K.cychp       | P2_(CytoScan750K_Array).cy750K.cychp       |
| P3_(CytoScan750K_Array).cy750K.cychp       | P3_(CytoScan750K_Array).cy750K.cychp       |
| P4_(CytoScan750K_Array).cy750K.cychp       | P4_(CytoScan750K_Array).cy750K.cychp       |
| P5_(CytoScan750K_Array).cy750K.cychp       | P5_(CytoScan750K_Array).cy750K.cychp       |
| P6_(CytoScan750K_Array).cy750K.cychp       | P6_(CytoScan750K_Array).cy750K.cychp       |
| P7_(CytoScan750K_Array).cy750K.cychp       | P7_(CytoScan750K_Array).cy750K.cychp       |
| P8_(CytoScan750K_Array)(1).cy750K.cychp    | P8_(CytoScan750K_Array)(1).cy750K.cychp    |
| P9_(CytoScan750K_Array)(1).cy750K.cychp    | P9_(CytoScan750K_Array)(1).cy750K.cychp    |
| CONTROL2_(CytoScan750K_Array).cy750K.cychp | CONTROL2_(CytoScan750K_Array).cy750K.cychp |

## Genome Filters

| Segment Type | Filter Type    | Minimum Filter Value |
|--------------|----------------|----------------------|
| Gain         | Segment Length | 400000               |

| Segment Type | Filter Type  | Minimum Filter Value |
|--------------|--------------|----------------------|
| Gain         | Marker Count | 50                   |

### Settings for P9\_(CytoScan750K\_Array)(1).cy750K.cychp

| Setting Type             | Setting                                                   |
|--------------------------|-----------------------------------------------------------|
| Smoothing                | On                                                        |
| Smoothing Max Jump Limit | Off                                                       |
| Joining                  | 25 Markers, 200 kbp                                       |
| Joining Max Jump Limit   | Off                                                       |
| Restricted Mode          | Off                                                       |
| QC Metrics               | mapd $\leq$ 0.25; snpQC $\geq$ 15; wavinessSd $\leq$ 0.12 |

### Settings for P4\_(CytoScan750K\_Array).cy750K.cychp

| Setting Type             | Setting                                                   |
|--------------------------|-----------------------------------------------------------|
| Smoothing                | On                                                        |
| Smoothing Max Jump Limit | Off                                                       |
| Joining                  | 25 Markers, 200 kbp                                       |
| Joining Max Jump Limit   | Off                                                       |
| Restricted Mode          | Off                                                       |
| QC Metrics               | mapd $\leq$ 0.25; snpQC $\geq$ 15; wavinessSd $\leq$ 0.12 |

### Settings for P8\_(CytoScan750K\_Array)(1).cy750K.cychp

| Setting Type             | Setting |
|--------------------------|---------|
| Smoothing                | On      |
| Smoothing Max Jump Limit | Off     |

| Setting Type           | Setting                                                   |
|------------------------|-----------------------------------------------------------|
| Joining                | 25 Markers, 200 kbp                                       |
| Joining Max Jump Limit | Off                                                       |
| Restricted Mode        | Off                                                       |
| QC Metrics             | mapd $\leq$ 0.25; snpQC $\geq$ 15; wavinessSd $\leq$ 0.12 |

### Settings for CONTROL2\_(CytoScan750K\_Array).cy750K.cychp

| Setting Type             | Setting                                                   |
|--------------------------|-----------------------------------------------------------|
| Smoothing                | On                                                        |
| Smoothing Max Jump Limit | Off                                                       |
| Joining                  | 25 Markers, 200 kbp                                       |
| Joining Max Jump Limit   | Off                                                       |
| Restricted Mode          | Off                                                       |
| QC Metrics               | mapd $\leq$ 0.25; snpQC $\geq$ 15; wavinessSd $\leq$ 0.12 |

### Settings for P2\_(CytoScan750K\_Array).cy750K.cychp

| Setting Type             | Setting                                                   |
|--------------------------|-----------------------------------------------------------|
| Smoothing                | On                                                        |
| Smoothing Max Jump Limit | Off                                                       |
| Joining                  | 25 Markers, 200 kbp                                       |
| Joining Max Jump Limit   | Off                                                       |
| Restricted Mode          | Off                                                       |
| QC Metrics               | mapd $\leq$ 0.25; snpQC $\geq$ 15; wavinessSd $\leq$ 0.12 |

### Settings for P7\_(CytoScan750K\_Array).cy750K.cychp

| Setting Type             | Setting                                                   |
|--------------------------|-----------------------------------------------------------|
| Smoothing                | On                                                        |
| Smoothing Max Jump Limit | Off                                                       |
| Joining                  | 25 Markers, 200 kbp                                       |
| Joining Max Jump Limit   | Off                                                       |
| Restricted Mode          | Off                                                       |
| QC Metrics               | mapd $\leq$ 0.25; snpQC $\geq$ 15; wavinessSd $\leq$ 0.12 |

### Settings for P5\_(CytoScan750K\_Array).cy750K.cychp

| Setting Type             | Setting                                                   |
|--------------------------|-----------------------------------------------------------|
| Smoothing                | On                                                        |
| Smoothing Max Jump Limit | Off                                                       |
| Joining                  | 25 Markers, 200 kbp                                       |
| Joining Max Jump Limit   | Off                                                       |
| Restricted Mode          | Off                                                       |
| QC Metrics               | mapd $\leq$ 0.25; snpQC $\geq$ 15; wavinessSd $\leq$ 0.12 |

### Settings for P3\_(CytoScan750K\_Array).cy750K.cychp

| Setting Type             | Setting             |
|--------------------------|---------------------|
| Smoothing                | On                  |
| Smoothing Max Jump Limit | Off                 |
| Joining                  | 25 Markers, 200 kbp |
| Joining Max Jump Limit   | Off                 |
| Restricted Mode          | Off                 |

| Setting Type | Setting                                                   |
|--------------|-----------------------------------------------------------|
| QC Metrics   | mapd $\leq$ 0.25; snpQC $\geq$ 15; wavinessSd $\leq$ 0.12 |

### Settings for P1\_(CytoScan750K\_Array).cy750K.cychp

| Setting Type             | Setting                                                   |
|--------------------------|-----------------------------------------------------------|
| Smoothing                | On                                                        |
| Smoothing Max Jump Limit | Off                                                       |
| Joining                  | 25 Markers, 200 kbp                                       |
| Joining Max Jump Limit   | Off                                                       |
| Restricted Mode          | Off                                                       |
| QC Metrics               | mapd $\leq$ 0.25; snpQC $\geq$ 15; wavinessSd $\leq$ 0.12 |

### Settings for P6\_(CytoScan750K\_Array).cy750K.cychp

| Setting Type             | Setting                                                   |
|--------------------------|-----------------------------------------------------------|
| Smoothing                | On                                                        |
| Smoothing Max Jump Limit | Off                                                       |
| Joining                  | 25 Markers, 200 kbp                                       |
| Joining Max Jump Limit   | Off                                                       |
| Restricted Mode          | Off                                                       |
| QC Metrics               | mapd $\leq$ 0.25; snpQC $\geq$ 15; wavinessSd $\leq$ 0.12 |

### Microarray Nomenclature

|                                                                                                                                                                                 |
|---------------------------------------------------------------------------------------------------------------------------------------------------------------------------------|
| <p>P4_(CytoScan750K_Array).cy750K.cychp:<br/>arr[hg19] 19p13.3(633,754-1,357,830)x3</p> <p>P3_(CytoScan750K_Array).cy750K.cychp:<br/>arr[hg19] 19p13.3(633,754-1,612,855)x3</p> |
|---------------------------------------------------------------------------------------------------------------------------------------------------------------------------------|

P7\_(CytoScan750K\_Array).cy750K.cychp:  
arr[hg19] 19p13.3(633,754-1,676,383)x3

P6\_(CytoScan750K\_Array).cy750K.cychp:  
arr[hg19] 19p13.3(633,754-1,676,446)x3

P5\_(CytoScan750K\_Array).cy750K.cychp:  
arr[hg19] 19p13.3(633,754-1,709,958)x3

P2\_(CytoScan750K\_Array).cy750K.cychp:  
arr[hg19] 19p13.3(675,955-1,612,855)x3

P9\_(CytoScan750K\_Array)(1).cy750K.cychp:  
arr[hg19] 19p13.3(675,955-1,676,383)x3

P8\_(CytoScan750K\_Array)(1).cy750K.cychp:  
arr[hg19] 19p13.3(675,955-1,676,383)x3

P1\_(CytoScan750K\_Array).cy750K.cychp:  
arr[hg19] 19p13.3(1,221,968-1,676,383)x3

## Segments

| File                                 | CN State | Type | Chromosome | Cytoband Start | Size (kb) | Marker Count | Gene Count | Genes                                                                                                                                                                                                                                                                    | OMIM ® Genes Count | OMIM ® Genes                                                                                                                                                                                                                                                                                                                                                                                                                                                                                                                                                                                                                                                                                         | CytoRegions         | Call | Interpretation | Curator By | Materially Modified Segment | Microarray Nomenclature               |
|--------------------------------------|----------|------|------------|----------------|-----------|--------------|------------|--------------------------------------------------------------------------------------------------------------------------------------------------------------------------------------------------------------------------------------------------------------------------|--------------------|------------------------------------------------------------------------------------------------------------------------------------------------------------------------------------------------------------------------------------------------------------------------------------------------------------------------------------------------------------------------------------------------------------------------------------------------------------------------------------------------------------------------------------------------------------------------------------------------------------------------------------------------------------------------------------------------------|---------------------|------|----------------|------------|-----------------------------|---------------------------------------|
| P4_(CytoScan750K_Array).cy750K.cychp | 3.00     | Gain | 19         | p13.3          | 724       | 84           | 36         | FGF22, RNF126, FSTL3, PRSS57, PALM, MISP, PTBP1, MIR4745, LPPR3, MIR3187, AZU1, PRTN3, ELANE, CFD, MED16, R3HDM4, KISS1R, ARID3A, WDR18, GRIN3B, TMEM259, CNN2, ABCA7, HMHA1, POLR2E, GPX4, SBNO2, STK11, C19orf26, ATP5D, MIDN, CIRBP-AS1, CIRBP, C19orf24, EFNA2, MUM1 | 26                 | <a href="#">FGF22 (605831)</a> ,<br><a href="#">RNF126 (615177)</a> ,<br><a href="#">FSTL3 (605343)</a> ,<br><a href="#">PALM (608134)</a> ,<br><a href="#">MISP (615289)</a> ,<br><a href="#">PTBP1 (600693)</a> ,<br><a href="#">CFD (610391)</a> ,<br><a href="#">AZU1 (162815)</a> ,<br><a href="#">PRTN3 (177020)</a> ,<br><a href="#">ELANE (130130)</a> ,<br><a href="#">CFD (134350)</a> ,<br><a href="#">MED16 (604062)</a> ,<br><a href="#">KISS1R (604161)</a> ,<br><a href="#">ARID3A (603265)</a> ,<br><a href="#">GRIN3B (606651)</a> ,<br><a href="#">TMEM259 (611011)</a> ,<br><a href="#">CNN2 (602373)</a> ,<br><a href="#">ABCA7 (605414)</a> ,<br><a href="#">HMHA1 (601155)</a> | Cytoregions Not Set |      |                |            | false                       | arr[hg19]19p13.3(633,754-1,357,830)x3 |

| File | CN State | Type | Chromosome | Cytoband Start | Size (kb) | Marker Count | Gene Count | Genes | OMIM® Genes Count | OMIM® Genes                                                                                                                                                                                                                               | CytoRegions | Call | Interpretation | Curator By | Materially Modified Segment | Microarray Nomenclature |  |
|------|----------|------|------------|----------------|-----------|--------------|------------|-------|-------------------|-------------------------------------------------------------------------------------------------------------------------------------------------------------------------------------------------------------------------------------------|-------------|------|----------------|------------|-----------------------------|-------------------------|--|
|      |          |      |            |                |           |              |            |       |                   | <a href="#">POLR2E (180664)</a><br><a href="#">GPX4 (138322)</a><br><a href="#">STK11 (602216)</a><br><a href="#">ATP5D (603150)</a><br><a href="#">MIDN (606700)</a><br><a href="#">CIRBP (602649)</a><br><a href="#">EFNA2 (602756)</a> |             |      |                |            |                             |                         |  |



| File                                   | CN State | Type | Chromosome | Cytoband Start | Size (kb) | Marker Count | Gene Count | Genes                                                                                                                                                                                                                                                                                                                 | OMIM ® Genes Count | OMIM ® Genes                                                                                                                                                                                                                                                                                                       | CytoRegions         | Call | Interpretation | Curator By | Materially Modified Segment | Microarray Nomenclature               |
|----------------------------------------|----------|------|------------|----------------|-----------|--------------|------------|-----------------------------------------------------------------------------------------------------------------------------------------------------------------------------------------------------------------------------------------------------------------------------------------------------------------------|--------------------|--------------------------------------------------------------------------------------------------------------------------------------------------------------------------------------------------------------------------------------------------------------------------------------------------------------------|---------------------|------|----------------|------------|-----------------------------|---------------------------------------|
| P3_(Cyto Scan750 K_Array).cy750K.cychp | 3.00     | Gain | 19         | p13.3          | 979       | 128          | 50         | FGF22, RNF126, FSTL3, PRSS57, PALM, MISP, PTBP1, MIR4745, LPPR3, MIR3187, AZU1, PRTN3, ELANE, CFD, MED16, R3HDM4, KISS1R, ARID3A, WDR18, GRIN3B, TMEM259, CNN2, ABCA7, HMHA1, POLR2E, GPX4, SBNO2, STK11, C19orf26, ATP5D, MIDN, CIRBP-AS1, CIRBP, C19orf24, EFNA2, MUM1, NDUFS7, GAMT, DAZAP1, RPS15, APC2, C19orf25 | 37                 | FGF22 (605831), RNF126 (615177), FSTL3 (605343), PALM (608134), MISP (615289), PTBP1 (600693), - (610391), AZU1 (162815), PRTN3 (177020), ELANE (130130), CFD (134350), MED16 (604062), KISS1R (604161), ARID3A (603265), GRIN3B (606651), <u>TMEM259</u> (611011), CNN2 (602373), ABCA7 (605414), HMHA1 (601155), | Cytoregions Not Set |      |                |            | false                       | arr[hg19]19p13.3(633,754-1,612,855)x3 |

| File | CN State | Type | Chromosome | Cytoband Start | Size (kbp) | Marker Count | Gene Count | Genes                                                                                           | OMIM ® Genes Count | OMIM ® Genes                                                                                                                                                                                                                                                                                                                                                                                                                         | CytoRegions | Call | Interpretation | Curator By | Materially Modified Segment | Microarray Nomenclature |  |
|------|----------|------|------------|----------------|------------|--------------|------------|-------------------------------------------------------------------------------------------------|--------------------|--------------------------------------------------------------------------------------------------------------------------------------------------------------------------------------------------------------------------------------------------------------------------------------------------------------------------------------------------------------------------------------------------------------------------------------|-------------|------|----------------|------------|-----------------------------|-------------------------|--|
|      |          |      |            |                |            |              |            | C19orf25<br>, PCSK4,<br>REEP6,<br>ADAMT<br>SL5,<br>PLK5,<br>MEX3D,<br>MBD3,<br>UQCR11<br>, TCF3 |                    | ,<br>POLR2E<br>(180664)<br>, GPX4<br>(138322)<br>, STK11<br>(602216)<br>, ATP5D<br>(603150)<br>, MIDN<br>(606700)<br>, CIRBP<br>(602649)<br>, EFNA2<br>(602756)<br>,<br>NDUFS7<br>(601825)<br>, GAMT<br>(601240)<br>,<br>DAZAP1<br>(607430)<br>, RPS15<br>(180535)<br>, APC2<br>(612034)<br>, PCSK4<br>(600487)<br>, REEP6<br>(609346)<br>, MEX3D<br>(611009)<br>, MBD3<br>(603573)<br>,<br>UQCR11<br>(609711)<br>, TCF3<br>(147141) |             |      |                |            |                             |                         |  |

| File                                   | CN State | Type | Chromosome | Cytoband Start | Size (kb) | Marker Count | Gene Count | Genes                                                                                                                                                                                                                                                                                                                 | OMIM ® Genes Count | OMIM ® Genes                                                                                                                                                                                                                                                                                                | CytoRegions         | Call | Interpretation | Curator By | Materially Modified Segment | Microarray Nomenclature               |
|----------------------------------------|----------|------|------------|----------------|-----------|--------------|------------|-----------------------------------------------------------------------------------------------------------------------------------------------------------------------------------------------------------------------------------------------------------------------------------------------------------------------|--------------------|-------------------------------------------------------------------------------------------------------------------------------------------------------------------------------------------------------------------------------------------------------------------------------------------------------------|---------------------|------|----------------|------------|-----------------------------|---------------------------------------|
| P7_(Cyto Scan750 K_Array).cy750K.cychp | 3.00     | Gain | 19         | p13.3          | 1,043     | 140          | 50         | FGF22, RNF126, FSTL3, PRSS57, PALM, MISP, PTBP1, MIR4745, LPPR3, MIR3187, AZU1, PRTN3, ELANE, CFD, MED16, R3HDM4, KISS1R, ARID3A, WDR18, GRIN3B, TMEM259, CNN2, ABCA7, HMHA1, POLR2E, GPX4, SBNO2, STK11, C19orf26, ATP5D, MIDN, CIRBP-AS1, CIRBP, C19orf24, EFNA2, MUM1, NDUFS7, GAMT, DAZAP1, RPS15, APC2, C19orf25 | 37                 | FGF22 (605831), RNF126 (615177), FSTL3 (605343), PALM (608134), MISP (615289), PTBP1 (600693), - (610391), AZU1 (162815), PRTN3 (177020), ELANE (130130), CFD (134350), MED16 (604062), KISS1R (604161), ARID3A (603265), GRIN3B (606651), TMEM259 (611011), CNN2 (602373), ABCA7 (605414), HMHA1 (601155), | Cytoregions Not Set |      |                |            | false                       | arr[hg19]19p13.3(633,754-1,676,383)x3 |

| File | CN State | Type | Chromosome | Cytoband Start | Size (kbp) | Marker Count | Gene Count | Genes                                                                                           | OMIM ® Genes Count | OMIM ® Genes                                                                                                                                                                                                                                                                                                                                                                                                                      | CytoRegions | Call | Interpretation | Curator By | Materially Modified Segment | Microarray Nomenclature |  |
|------|----------|------|------------|----------------|------------|--------------|------------|-------------------------------------------------------------------------------------------------|--------------------|-----------------------------------------------------------------------------------------------------------------------------------------------------------------------------------------------------------------------------------------------------------------------------------------------------------------------------------------------------------------------------------------------------------------------------------|-------------|------|----------------|------------|-----------------------------|-------------------------|--|
|      |          |      |            |                |            |              |            | C19orf25<br>, PCSK4,<br>REEP6,<br>ADAMT<br>SL5,<br>PLK5,<br>MEX3D,<br>MBD3,<br>UQCR11<br>, TCF3 |                    | , POLR2E<br>(180664)<br>, GPX4<br>(138322)<br>, STK11<br>(602216)<br>, ATP5D<br>(603150)<br>, MIDN<br>(606700)<br>, CIRBP<br>(602649)<br>, EFNA2<br>(602756)<br>,<br>NDUFS7<br>(601825)<br>, GAMT<br>(601240)<br>,<br>DAZAP1<br>(607430)<br>, RPS15<br>(180535)<br>, APC2<br>(612034)<br>, PCSK4<br>(600487)<br>, REEP6<br>(609346)<br>, MEX3D<br>(611009)<br>, MBD3<br>(603573)<br>,<br>UQCR11<br>(609711)<br>, TCF3<br>(147141) |             |      |                |            |                             |                         |  |

| File                                   | CN State | Type | Chromosome | Cytoband Start | Size (kbp) | Marker Count | Gene Count | Genes                                                                                                                                                                                                                                                                                                                 | OMIM ® Genes Count | OMIM ® Genes                                                                                                                                                                                                                                                                                                | CytoRegions         | Call | Interpretation | Curator By | Materially Modified Segment | Microarray Nomenclature               |
|----------------------------------------|----------|------|------------|----------------|------------|--------------|------------|-----------------------------------------------------------------------------------------------------------------------------------------------------------------------------------------------------------------------------------------------------------------------------------------------------------------------|--------------------|-------------------------------------------------------------------------------------------------------------------------------------------------------------------------------------------------------------------------------------------------------------------------------------------------------------|---------------------|------|----------------|------------|-----------------------------|---------------------------------------|
| P6_(Cyto Scan750 K_Array).cy750K.cychp | 3.00     | Gain | 19         | p13.3          | 1,043      | 141          | 50         | FGF22, RNF126, FSTL3, PRSS57, PALM, MISP, PTBP1, MIR4745, LPPR3, MIR3187, AZU1, PRTN3, ELANE, CFD, MED16, R3HDM4, KISS1R, ARID3A, WDR18, GRIN3B, TMEM259, CNN2, ABCA7, HMHA1, POLR2E, GPX4, SBNO2, STK11, C19orf26, ATP5D, MIDN, CIRBP-AS1, CIRBP, C19orf24, EFNA2, MUM1, NDUFS7, GAMT, DAZAP1, RPS15, APC2, C19orf25 | 37                 | FGF22 (605831), RNF126 (615177), FSTL3 (605343), PALM (608134), MISP (615289), PTBP1 (600693), - (610391), AZU1 (162815), PRTN3 (177020), ELANE (130130), CFD (134350), MED16 (604062), KISS1R (604161), ARID3A (603265), GRIN3B (606651), TMEM259 (611011), CNN2 (602373), ABCA7 (605414), HMHA1 (601155), | Cytoregions Not Set |      |                |            | false                       | arr[hg19]19p13.3(633,754-1,676,446)x3 |

| File | CN State | Type | Chromosome | Cytoband Start | Size (kbp) | Marker Count | Gene Count | Genes                                                                                           | OMIM ® Genes Count | OMIM ® Genes                                                                                                                                                                                                                                                                                                                                                                                                                         | CytoRegions | Call | Interpretation | Curator By | Materially Modified Segment | Microarray Nomenclature |  |
|------|----------|------|------------|----------------|------------|--------------|------------|-------------------------------------------------------------------------------------------------|--------------------|--------------------------------------------------------------------------------------------------------------------------------------------------------------------------------------------------------------------------------------------------------------------------------------------------------------------------------------------------------------------------------------------------------------------------------------|-------------|------|----------------|------------|-----------------------------|-------------------------|--|
|      |          |      |            |                |            |              |            | C19orf25<br>, PCSK4,<br>REEP6,<br>ADAMT<br>SL5,<br>PLK5,<br>MEX3D,<br>MBD3,<br>UQCR11<br>, TCF3 |                    | ,<br>POLR2E<br>(180664)<br>, GPX4<br>(138322)<br>, STK11<br>(602216)<br>, ATP5D<br>(603150)<br>, MIDN<br>(606700)<br>, CIRBP<br>(602649)<br>, EFNA2<br>(602756)<br>,<br>NDUFS7<br>(601825)<br>, GAMT<br>(601240)<br>,<br>DAZAP1<br>(607430)<br>, RPS15<br>(180535)<br>, APC2<br>(612034)<br>, PCSK4<br>(600487)<br>, REEP6<br>(609346)<br>, MEX3D<br>(611009)<br>, MBD3<br>(603573)<br>,<br>UQCR11<br>(609711)<br>, TCF3<br>(147141) |             |      |                |            |                             |                         |  |

| File                                   | CN State | Type | Chromosome | Cytoband Start | Size (kbp) | Marker Count | Gene Count | Genes                                                                                                                                                                                                                                                                                                                 | OMIM ® Genes Count | OMIM ® Genes                                                                                                                                                                                                                                                                                               | CytoRegions         | Call | Interpretation | Curator By | Materially Modified Segment | Microarray Nomenclature |                                       |
|----------------------------------------|----------|------|------------|----------------|------------|--------------|------------|-----------------------------------------------------------------------------------------------------------------------------------------------------------------------------------------------------------------------------------------------------------------------------------------------------------------------|--------------------|------------------------------------------------------------------------------------------------------------------------------------------------------------------------------------------------------------------------------------------------------------------------------------------------------------|---------------------|------|----------------|------------|-----------------------------|-------------------------|---------------------------------------|
| P5_(Cyto Scan750 K_Array).cy750K.cychp | 3.00     | Gain | 19         | p13.3          | 1,076      | 143          | 50         | FGF22, RNF126, FSTL3, PRSS57, PALM, MISP, PTBP1, MIR4745, LPPR3, MIR3187, AZU1, PRTN3, ELANE, CFD, MED16, R3HDM4, KISS1R, ARID3A, WDR18, GRIN3B, TMEM259, CNN2, ABCA7, HMHA1, POLR2E, GPX4, SBNO2, STK11, C19orf26, ATP5D, MIDN, CIRBP-AS1, CIRBP, C19orf24, EFNA2, MUM1, NDUFS7, GAMT, DAZAP1, RPS15, APC2, C19orf25 | 37                 | FGF22 (605831), RNF126 (615177), FSTL3 (605343), PALM (608134), MISP (615289), PTBP1 (600693), - (610391), AZU1 (162815), PRTN3 (177020), ELANE (130130), CFD (134350), MED16 (604062), KISS1R (604161), ARID3A (603265), GRIN3B (606651), TMEM259 (611011), CNN2 (602373), ABCA7 (605414), HMHA1 (601155) | Cytoregions Not Set |      |                |            |                             | false                   | arr[hg19]19p13.3(633,754-1,709,958)x3 |

| File | CN State | Type | Chromosome | Cytoband Start | Size (kbp) | Marker Count | Gene Count | Genes                                                                                           | OMIM ® Genes Count | OMIM ® Genes                                                                                                                                                                                                                                                                                                                                                                                                                         | CytoRegions | Call | Interpretation | Curator By | Materially Modified Segment | Microarray Nomenclature |  |
|------|----------|------|------------|----------------|------------|--------------|------------|-------------------------------------------------------------------------------------------------|--------------------|--------------------------------------------------------------------------------------------------------------------------------------------------------------------------------------------------------------------------------------------------------------------------------------------------------------------------------------------------------------------------------------------------------------------------------------|-------------|------|----------------|------------|-----------------------------|-------------------------|--|
|      |          |      |            |                |            |              |            | C19orf25<br>, PCSK4,<br>REEP6,<br>ADAMT<br>SL5,<br>PLK5,<br>MEX3D,<br>MBD3,<br>UQCR11<br>, TCF3 |                    | ,<br>POLR2E<br>(180664)<br>, GPX4<br>(138322)<br>, STK11<br>(602216)<br>, ATP5D<br>(603150)<br>, MIDN<br>(606700)<br>, CIRBP<br>(602649)<br>, EFNA2<br>(602756)<br>,<br>NDUFS7<br>(601825)<br>, GAMT<br>(601240)<br>,<br>DAZAP1<br>(607430)<br>, RPS15<br>(180535)<br>, APC2<br>(612034)<br>, PCSK4<br>(600487)<br>, REEP6<br>(609346)<br>, MEX3D<br>(611009)<br>, MBD3<br>(603573)<br>,<br>UQCR11<br>(609711)<br>, TCF3<br>(147141) |             |      |                |            |                             |                         |  |



| File                                   | CN State | Type | Chromosome | Cytoband Start | Size (kbp) | Marker Count | Gene Count | Genes                                                                                                                                                                                                                                                                                                                 | OMIM ® Genes Count | OMIM ® Genes                                                                                                                                                                                                                                                                                                      | CytoRegions         | Call | Interpretation | Curator By | Materially Modified Segment | Microarray Nomenclature               |
|----------------------------------------|----------|------|------------|----------------|------------|--------------|------------|-----------------------------------------------------------------------------------------------------------------------------------------------------------------------------------------------------------------------------------------------------------------------------------------------------------------------|--------------------|-------------------------------------------------------------------------------------------------------------------------------------------------------------------------------------------------------------------------------------------------------------------------------------------------------------------|---------------------|------|----------------|------------|-----------------------------|---------------------------------------|
| P2_(Cyto Scan750 K_Array).cy750K.cychp | 3.00     | Gain | 19         | p13.3          | 937        | 116          | 48         | FSTL3, PRSS57, PALM, MISP, PTBP1, MIR4745, LPPR3, MIR3187, AZU1, PRTN3, ELANE, CFD, MED16, R3HDM4, KISS1R, ARID3A, WDR18, GRIN3B, TMEM259, CNN2, ABCA7, HMHA1, POLR2E, GPX4, SBNO2, STK11, C19orf26, ATP5D, MIDN, CIRBP-AS1, CIRBP, C19orf24, EFNA2, MUM1, NDUFS7, GAMT, DAZAP1, RPS15, APC2, C19orf25, PCSK4, REEP6, | 35                 | FSTL3 (605343), PALM (608134), MISP (615289), PTBP1 (600693), -, (610391), AZU1 (162815), PRTN3 (177020), ELANE (130130), CFD (134350), MED16 (604062), KISS1R (604161), ARID3A (603265), GRIN3B (606651), TMEM259 (611011), CNN2 (602373), ABCA7 (605414), HMHA1 (601155), POLR2E (180664), GPX4 (138322), STK11 | Cytoregions Not Set |      |                |            | false                       | arr[hg19]19p13.3(675,955-1,612,855)x3 |

| File | CN State | Type | Chromosome | Cytoband Start | Size (kb) | Marker Count | Gene Count | Genes                                                                   | OMIM® Genes Count | OMIM® Genes                                                                                                                                                                                                                                                                                                                                                                         | CytoRegions | Call | Interpretation | Curator By | Materially Modified Segment | Microarray Nomenclature |  |
|------|----------|------|------------|----------------|-----------|--------------|------------|-------------------------------------------------------------------------|-------------------|-------------------------------------------------------------------------------------------------------------------------------------------------------------------------------------------------------------------------------------------------------------------------------------------------------------------------------------------------------------------------------------|-------------|------|----------------|------------|-----------------------------|-------------------------|--|
|      |          |      |            |                |           |              |            | REEP6,<br>ADAMT<br>SL5,<br>PLK5,<br>MEX3D,<br>MBD3,<br>UQCR11<br>, TCF3 |                   | , STK11<br>(602216)<br>, ATP5D<br>(603150)<br>, MIDN<br>(606700)<br>, CIRBP<br>(602649)<br>, EFNA2<br>(602756)<br>,<br>NDUFS7<br>(601825)<br>, GAMT<br>(601240)<br>,<br>DAZAP1<br>(607430)<br>, RPS15<br>(180535)<br>, APC2<br>(612034)<br>, PCSK4<br>(600487)<br>, REEP6<br>(609346)<br>, MEX3D<br>(611009)<br>, MBD3<br>(603573)<br>,<br>UQCR11<br>(609711)<br>, TCF3<br>(147141) |             |      |                |            |                             |                         |  |

| File                                        | CN State | Type | Chromosome | Cytoband Start | Size (kbp) | Marker Count | Gene Count | Genes                                                                                                                                                                                                                                                                                                                 | OMIM ® Genes Count | OMIM ® Genes                                                                                                                                                                                                                                                                                                      | CytoRegions         | Call | Interpretation | Curator By | Materially Modified Segment | Microarray Nomenclature                |
|---------------------------------------------|----------|------|------------|----------------|------------|--------------|------------|-----------------------------------------------------------------------------------------------------------------------------------------------------------------------------------------------------------------------------------------------------------------------------------------------------------------------|--------------------|-------------------------------------------------------------------------------------------------------------------------------------------------------------------------------------------------------------------------------------------------------------------------------------------------------------------|---------------------|------|----------------|------------|-----------------------------|----------------------------------------|
| P9_(Cyto Scan750 K_Array) (1).cy75 OK.cychp | 3.00     | Gain | 19         | p13.3          | 1,000      | 128          | 48         | FSTL3, PRSS57, PALM, MISP, PTBP1, MIR4745, LPPR3, MIR3187, AZU1, PRTN3, ELANE, CFD, MED16, R3HDM4, KISS1R, ARID3A, WDR18, GRIN3B, TMEM259, CNN2, ABCA7, HMHA1, POLR2E, GPX4, SBNO2, STK11, C19orf26, ATP5D, MIDN, CIRBP-AS1, CIRBP, C19orf24, EFNA2, MUM1, NDUFS7, GAMT, DAZAP1, RPS15, APC2, C19orf25, PCSK4, REEP6, | 35                 | FSTL3 (605343), PALM (608134), MISP (615289), PTBP1 (600693), -, (610391), AZU1 (162815), PRTN3 (177020), ELANE (130130), CFD (134350), MED16 (604062), KISS1R (604161), ARID3A (603265), GRIN3B (606651), TMEM259 (611011), CNN2 (602373), ABCA7 (605414), HMHA1 (601155), POLR2E (180664), GPX4 (138322), STK11 | Cytoregions Not Set |      |                |            | false                       | arr[hg19] 19p13.3(675,955-1,676,383)x3 |

| File | CN State | Type | Chromosome | Cytoband Start | Size (kbp) | Marker Count | Gene Count | Genes                                                                   | OMIM® Genes Count | OMIM® Genes                                                                                                                                                                                                                                                                                                                                                                         | CytoRegions | Call | Interpretation | Curator By | Materially Modified Segment | Microarray Nomenclature |  |
|------|----------|------|------------|----------------|------------|--------------|------------|-------------------------------------------------------------------------|-------------------|-------------------------------------------------------------------------------------------------------------------------------------------------------------------------------------------------------------------------------------------------------------------------------------------------------------------------------------------------------------------------------------|-------------|------|----------------|------------|-----------------------------|-------------------------|--|
|      |          |      |            |                |            |              |            | REEP6,<br>ADAMT<br>SL5,<br>PLK5,<br>MEX3D,<br>MBD3,<br>UQCR11<br>, TCF3 |                   | , STK11<br>(602216)<br>, ATP5D<br>(603150)<br>, MIDN<br>(606700)<br>, CIRBP<br>(602649)<br>, EFNA2<br>(602756)<br>,<br>NDUFS7<br>(601825)<br>, GAMT<br>(601240)<br>,<br>DAZAP1<br>(607430)<br>, RPS15<br>(180535)<br>, APC2<br>(612034)<br>, PCSK4<br>(600487)<br>, REEP6<br>(609346)<br>, MEX3D<br>(611009)<br>, MBD3<br>(603573)<br>,<br>UQCR11<br>(609711)<br>, TCF3<br>(147141) |             |      |                |            |                             |                         |  |

| File                                        | CN State | Type | Chromosome | Cytoband Start | Size (kbp) | Marker Count | Gene Count | Genes                                                                                                                                                                                                                                                                                                                 | OMIM ® Genes Count | OMIM ® Genes                                                                                                                                                                                                                                                                                                      | CytoRegions         | Call | Interpretation | Curator By | Materially Modified Segment | Microarray Nomenclature                |
|---------------------------------------------|----------|------|------------|----------------|------------|--------------|------------|-----------------------------------------------------------------------------------------------------------------------------------------------------------------------------------------------------------------------------------------------------------------------------------------------------------------------|--------------------|-------------------------------------------------------------------------------------------------------------------------------------------------------------------------------------------------------------------------------------------------------------------------------------------------------------------|---------------------|------|----------------|------------|-----------------------------|----------------------------------------|
| P8_(Cyto Scan750 K_Array) (1).cy75 OK.cychp | 3.00     | Gain | 19         | p13.3          | 1,000      | 128          | 48         | FSTL3, PRSS57, PALM, MISP, PTBP1, MIR4745, LPPR3, MIR3187, AZU1, PRTN3, ELANE, CFD, MED16, R3HDM4, KISS1R, ARID3A, WDR18, GRIN3B, TMEM259, CNN2, ABCA7, HMHA1, POLR2E, GPX4, SBNO2, STK11, C19orf26, ATP5D, MIDN, CIRBP-AS1, CIRBP, C19orf24, EFNA2, MUM1, NDUFS7, GAMT, DAZAP1, RPS15, APC2, C19orf25, PCSK4, REEP6, | 35                 | FSTL3 (605343), PALM (608134), MISP (615289), PTBP1 (600693), -, (610391), AZU1 (162815), PRTN3 (177020), ELANE (130130), CFD (134350), MED16 (604062), KISS1R (604161), ARID3A (603265), GRIN3B (606651), TMEM259 (611011), CNN2 (602373), ABCA7 (605414), HMHA1 (601155), POLR2E (180664), GPX4 (138322), STK11 | Cytoregions Not Set |      |                |            | false                       | arr[hg19] 19p13.3(675,955-1,676,383)x3 |

| File | CN State | Type | Chromosome | Cytoband Start | Size (kbp) | Marker Count | Gene Count | Genes                                                                   | OMIM ® Genes Count | OMIM ® Genes                                                                                                                                                                                                                                                                                                                                                                        | CytoRegions | Call | Interpretation | Curator By | Materially Modified Segment | Microarray Nomenclature |
|------|----------|------|------------|----------------|------------|--------------|------------|-------------------------------------------------------------------------|--------------------|-------------------------------------------------------------------------------------------------------------------------------------------------------------------------------------------------------------------------------------------------------------------------------------------------------------------------------------------------------------------------------------|-------------|------|----------------|------------|-----------------------------|-------------------------|
|      |          |      |            |                |            |              |            | REEP6,<br>ADAMT<br>SL5,<br>PLK5,<br>MEX3D,<br>MBD3,<br>UQCR11<br>, TCF3 |                    | , STK11<br>(602216)<br>, ATP5D<br>(603150)<br>, MIDN<br>(606700)<br>, CIRBP<br>(602649)<br>, EFNA2<br>(602756)<br>,<br>NDUFS7<br>(601825)<br>, GAMT<br>(601240)<br>,<br>DAZAP1<br>(607430)<br>, RPS15<br>(180535)<br>, APC2<br>(612034)<br>, PCSK4<br>(600487)<br>, REEP6<br>(609346)<br>, MEX3D<br>(611009)<br>, MBD3<br>(603573)<br>,<br>UQCR11<br>(609711)<br>, TCF3<br>(147141) |             |      |                |            |                             |                         |

| File                                   | CN State | Type | Chromosome | Cytoband Start | Size (kbp) | Marker Count | Gene Count | Genes                                                                                                                                                                       | OMIM ® Genes Count | OMIM ® Genes                                                                                                                                                                                                                                                 | CytoRegions         | Call | Interpretation | Curator By | Materially Modified Segment | Microarray Nomenclature                 |
|----------------------------------------|----------|------|------------|----------------|------------|--------------|------------|-----------------------------------------------------------------------------------------------------------------------------------------------------------------------------|--------------------|--------------------------------------------------------------------------------------------------------------------------------------------------------------------------------------------------------------------------------------------------------------|---------------------|------|----------------|------------|-----------------------------|-----------------------------------------|
| P1_(Cyto Scan750 K_Array).cy750K.cychp | 3.00     | Gain | 19         | p13.3          | 454        | 92           | 23         | STK11, C19orf26, ATP5D, MIDN, CIRBP-AS1, CIRBP, C19orf24, EFNA2, MUM1, NDUFS7, GAMT, DAZAP1, RPS15, APC2, C19orf25, PCSK4, REEP6, ADAMTSL5, PLK5, MEX3D, MBD3, UQCR11, TCF3 | 16                 | STK11 (602216), ATP5D (603150), MIDN (606700), CIRBP (602649), EFNA2 (602756), NDUFS7 (601825), GAMT (601240), DAZAP1 (607430), RPS15 (180535), APC2 (612034), PCSK4 (600487), REEP6 (609346), MEX3D (611009), MBD3 (603573), UQCR11 (609711), TCF3 (147141) | Cytoregions Not Set |      |                |            | false                       | arr[hg19]19p13.3(1,221,968-1,676,383)x3 |
