# Supplementary material
Source: PubMed Central journal article supplement (PMC6823329)
Supplement: 10815_2019_1547_MOESM4_ESM.pdf [file 10815_2019_1547_MOESM4_ESM.pdf]

## Data Files In View

| File Label                                 | File Name                                  |
|--------------------------------------------|--------------------------------------------|
| CONTROL1_(CytoScan750K_Array).cy750K.cychp | CONTROL1_(CytoScan750K_Array).cy750K.cychp |
| CONTROL3_(CytoScan750K_Array).cy750K.cychp | CONTROL3_(CytoScan750K_Array).cy750K.cychp |
| CONTROL4_(CytoScan750K_Array).cy750K.cychp | CONTROL4_(CytoScan750K_Array).cy750K.cychp |
| CONTROL5_(CytoScan750K_Array).cy750K.cychp | CONTROL5_(CytoScan750K_Array).cy750K.cychp |
| P10_(CytoScan750K_Array).cy750K.cychp      | P10_(CytoScan750K_Array).cy750K.cychp      |
| P11_(CytoScan750K_Array).cy750K.cychp      | P11_(CytoScan750K_Array).cy750K.cychp      |
| P12_(CytoScan750K_Array).cy750K.cychp      | P12_(CytoScan750K_Array).cy750K.cychp      |
| P13_(CytoScan750K_Array).cy750K.cychp      | P13_(CytoScan750K_Array).cy750K.cychp      |
| P14_(CytoScan750K_Array).cy750K.cychp      | P14_(CytoScan750K_Array).cy750K.cychp      |
| P15_(CytoScan750K_Array).cy750K.cychp      | P15_(CytoScan750K_Array).cy750K.cychp      |
| P16_(CytoScan750K_Array).cy750K.cychp      | P16_(CytoScan750K_Array).cy750K.cychp      |
| P17_(CytoScan750K_Array).cy750K.cychp      | P17_(CytoScan750K_Array).cy750K.cychp      |
| P1_(CytoScan750K_Array).cy750K.cychp       | P1_(CytoScan750K_Array).cy750K.cychp       |
| P4_(CytoScan750K_Array).cy750K.cychp       | P4_(CytoScan750K_Array).cy750K.cychp       |

| File Label                              | File Name                               |
|-----------------------------------------|-----------------------------------------|
| P5_(CytoScan750K_Array).cy750K.cychp    | P5_(CytoScan750K_Array).cy750K.cychp    |
| P6_(CytoScan750K_Array).cy750K.cychp    | P6_(CytoScan750K_Array).cy750K.cychp    |
| P7_(CytoScan750K_Array).cy750K.cychp    | P7_(CytoScan750K_Array).cy750K.cychp    |
| P8_(CytoScan750K_Array)(1).cy750K.cychp | P8_(CytoScan750K_Array)(1).cy750K.cychp |
| P9_(CytoScan750K_Array)(1).cy750K.cychp | P9_(CytoScan750K_Array)(1).cy750K.cychp |
| P2_(CytoScan750K_Array).cy750K.cychp    | P2_(CytoScan750K_Array).cy750K.cychp    |

### Genome Filters

| Segment Type | Filter Type    | Minimum Filter Value |
|--------------|----------------|----------------------|
| Gain         | Segment Length | 400000               |
| Gain         | Marker Count   | 50                   |

### Settings for P1\_(CytoScan750K\_Array).cy750K.cychp

| Setting Type             | Setting                                                   |
|--------------------------|-----------------------------------------------------------|
| Smoothing                | On                                                        |
| Smoothing Max Jump Limit | Off                                                       |
| Joining                  | 25 Markers, 200 kbp                                       |
| Joining Max Jump Limit   | Off                                                       |
| Restricted Mode          | Off                                                       |
| QC Metrics               | mapd $\leq$ 0.25; snpQC $\geq$ 15; wavinessSd $\leq$ 0.12 |

### Settings for P5\_(CytoScan750K\_Array).cy750K.cychp

| Setting Type | Setting |
|--------------|---------|
| Smoothing    | On      |

| Setting Type             | Setting                                                   |
|--------------------------|-----------------------------------------------------------|
| Smoothing Max Jump Limit | Off                                                       |
| Joining                  | 25 Markers, 200 kbp                                       |
| Joining Max Jump Limit   | Off                                                       |
| Restricted Mode          | Off                                                       |
| QC Metrics               | mapd $\leq$ 0.25; snpQC $\geq$ 15; wavinessSd $\leq$ 0.12 |

### Settings for P17\_(CytoScan750K\_Array).cy750K.cychp

| Setting Type             | Setting                                                   |
|--------------------------|-----------------------------------------------------------|
| Smoothing                | On                                                        |
| Smoothing Max Jump Limit | Off                                                       |
| Joining                  | 25 Markers, 200 kbp                                       |
| Joining Max Jump Limit   | Off                                                       |
| Restricted Mode          | Off                                                       |
| QC Metrics               | mapd $\leq$ 0.25; snpQC $\geq$ 15; wavinessSd $\leq$ 0.12 |

### Settings for CONTROL1\_(CytoScan750K\_Array).cy750K.cychp

| Setting Type             | Setting                                                   |
|--------------------------|-----------------------------------------------------------|
| Smoothing                | On                                                        |
| Smoothing Max Jump Limit | Off                                                       |
| Joining                  | 25 Markers, 200 kbp                                       |
| Joining Max Jump Limit   | Off                                                       |
| Restricted Mode          | Off                                                       |
| QC Metrics               | mapd $\leq$ 0.25; snpQC $\geq$ 15; wavinessSd $\leq$ 0.12 |

### Settings for P13\_(CytoScan750K\_Array).cy750K.cychp

| Setting Type             | Setting                                                   |
|--------------------------|-----------------------------------------------------------|
| Smoothing                | On                                                        |
| Smoothing Max Jump Limit | Off                                                       |
| Joining                  | 25 Markers, 200 kbp                                       |
| Joining Max Jump Limit   | Off                                                       |
| Restricted Mode          | Off                                                       |
| QC Metrics               | mapd $\leq$ 0.25; snpQC $\geq$ 15; wavinessSd $\leq$ 0.12 |

### Settings for P8\_(CytoScan750K\_Array)(1).cy750K.cychp

| Setting Type             | Setting                                                   |
|--------------------------|-----------------------------------------------------------|
| Smoothing                | On                                                        |
| Smoothing Max Jump Limit | Off                                                       |
| Joining                  | 25 Markers, 200 kbp                                       |
| Joining Max Jump Limit   | Off                                                       |
| Restricted Mode          | Off                                                       |
| QC Metrics               | mapd $\leq$ 0.25; snpQC $\geq$ 15; wavinessSd $\leq$ 0.12 |

### Settings for CONTROL4\_(CytoScan750K\_Array).cy750K.cychp

| Setting Type             | Setting             |
|--------------------------|---------------------|
| Smoothing                | On                  |
| Smoothing Max Jump Limit | Off                 |
| Joining                  | 25 Markers, 200 kbp |
| Joining Max Jump Limit   | Off                 |
| Restricted Mode          | Off                 |

| Setting Type | Setting                                                   |
|--------------|-----------------------------------------------------------|
| QC Metrics   | mapd $\leq$ 0.25; snpQC $\geq$ 15; wavinessSd $\leq$ 0.12 |

### Settings for P12\_(CytoScan750K\_Array).cy750K.cychp

| Setting Type             | Setting                                                   |
|--------------------------|-----------------------------------------------------------|
| Smoothing                | On                                                        |
| Smoothing Max Jump Limit | Off                                                       |
| Joining                  | 25 Markers, 200 kbp                                       |
| Joining Max Jump Limit   | Off                                                       |
| Restricted Mode          | Off                                                       |
| QC Metrics               | mapd $\leq$ 0.25; snpQC $\geq$ 15; wavinessSd $\leq$ 0.12 |

### Settings for P10\_(CytoScan750K\_Array).cy750K.cychp

| Setting Type             | Setting                                                   |
|--------------------------|-----------------------------------------------------------|
| Smoothing                | On                                                        |
| Smoothing Max Jump Limit | Off                                                       |
| Joining                  | 25 Markers, 200 kbp                                       |
| Joining Max Jump Limit   | Off                                                       |
| Restricted Mode          | Off                                                       |
| QC Metrics               | mapd $\leq$ 0.25; snpQC $\geq$ 15; wavinessSd $\leq$ 0.12 |

### Settings for P16\_(CytoScan750K\_Array).cy750K.cychp

| Setting Type             | Setting |
|--------------------------|---------|
| Smoothing                | On      |
| Smoothing Max Jump Limit | Off     |

| Setting Type           | Setting                                                   |
|------------------------|-----------------------------------------------------------|
| Joining                | 25 Markers, 200 kbp                                       |
| Joining Max Jump Limit | Off                                                       |
| Restricted Mode        | Off                                                       |
| QC Metrics             | mapd $\leq$ 0.25; snpQC $\geq$ 15; wavinessSd $\leq$ 0.12 |

### Settings for P4\_(CytoScan750K\_Array).cy750K.cychp

| Setting Type             | Setting                                                   |
|--------------------------|-----------------------------------------------------------|
| Smoothing                | On                                                        |
| Smoothing Max Jump Limit | Off                                                       |
| Joining                  | 25 Markers, 200 kbp                                       |
| Joining Max Jump Limit   | Off                                                       |
| Restricted Mode          | Off                                                       |
| QC Metrics               | mapd $\leq$ 0.25; snpQC $\geq$ 15; wavinessSd $\leq$ 0.12 |

### Settings for CONTROL5\_(CytoScan750K\_Array).cy750K.cychp

| Setting Type             | Setting                                                   |
|--------------------------|-----------------------------------------------------------|
| Smoothing                | On                                                        |
| Smoothing Max Jump Limit | Off                                                       |
| Joining                  | 25 Markers, 200 kbp                                       |
| Joining Max Jump Limit   | Off                                                       |
| Restricted Mode          | Off                                                       |
| QC Metrics               | mapd $\leq$ 0.25; snpQC $\geq$ 15; wavinessSd $\leq$ 0.12 |

### Settings for P11\_(CytoScan750K\_Array).cy750K.cychp

| Setting Type             | Setting                                                   |
|--------------------------|-----------------------------------------------------------|
| Smoothing                | On                                                        |
| Smoothing Max Jump Limit | Off                                                       |
| Joining                  | 25 Markers, 200 kbp                                       |
| Joining Max Jump Limit   | Off                                                       |
| Restricted Mode          | Off                                                       |
| QC Metrics               | mapd $\leq$ 0.25; snpQC $\geq$ 15; wavinessSd $\leq$ 0.12 |

### Settings for P9\_(CytoScan750K\_Array)(1).cy750K.cychp

| Setting Type             | Setting                                                   |
|--------------------------|-----------------------------------------------------------|
| Smoothing                | On                                                        |
| Smoothing Max Jump Limit | Off                                                       |
| Joining                  | 25 Markers, 200 kbp                                       |
| Joining Max Jump Limit   | Off                                                       |
| Restricted Mode          | Off                                                       |
| QC Metrics               | mapd $\leq$ 0.25; snpQC $\geq$ 15; wavinessSd $\leq$ 0.12 |

### Settings for P14\_(CytoScan750K\_Array).cy750K.cychp

| Setting Type             | Setting             |
|--------------------------|---------------------|
| Smoothing                | On                  |
| Smoothing Max Jump Limit | Off                 |
| Joining                  | 25 Markers, 200 kbp |
| Joining Max Jump Limit   | Off                 |
| Restricted Mode          | Off                 |

| Setting Type | Setting                                                   |
|--------------|-----------------------------------------------------------|
| QC Metrics   | mapd $\leq$ 0.25; snpQC $\geq$ 15; wavinessSd $\leq$ 0.12 |

### Settings for P6\_(CytoScan750K\_Array).cy750K.cychp

| Setting Type             | Setting                                                   |
|--------------------------|-----------------------------------------------------------|
| Smoothing                | On                                                        |
| Smoothing Max Jump Limit | Off                                                       |
| Joining                  | 25 Markers, 200 kbp                                       |
| Joining Max Jump Limit   | Off                                                       |
| Restricted Mode          | Off                                                       |
| QC Metrics               | mapd $\leq$ 0.25; snpQC $\geq$ 15; wavinessSd $\leq$ 0.12 |

### Settings for P15\_(CytoScan750K\_Array).cy750K.cychp

| Setting Type             | Setting                                                   |
|--------------------------|-----------------------------------------------------------|
| Smoothing                | On                                                        |
| Smoothing Max Jump Limit | Off                                                       |
| Joining                  | 25 Markers, 200 kbp                                       |
| Joining Max Jump Limit   | Off                                                       |
| Restricted Mode          | Off                                                       |
| QC Metrics               | mapd $\leq$ 0.25; snpQC $\geq$ 15; wavinessSd $\leq$ 0.12 |

### Settings for CONTROL3\_(CytoScan750K\_Array).cy750K.cychp

| Setting Type             | Setting |
|--------------------------|---------|
| Smoothing                | On      |
| Smoothing Max Jump Limit | Off     |



| Setting Type           | Setting                                                   |
|------------------------|-----------------------------------------------------------|
| Joining                | 25 Markers, 200 kbp                                       |
| Joining Max Jump Limit | Off                                                       |
| Restricted Mode        | Off                                                       |
| QC Metrics             | mapd $\leq$ 0.25; snpQC $\geq$ 15; wavinessSd $\leq$ 0.12 |

### Settings for P7\_(CytoScan750K\_Array).cy750K.cychp

| Setting Type             | Setting                                                   |
|--------------------------|-----------------------------------------------------------|
| Smoothing                | On                                                        |
| Smoothing Max Jump Limit | Off                                                       |
| Joining                  | 25 Markers, 200 kbp                                       |
| Joining Max Jump Limit   | Off                                                       |
| Restricted Mode          | Off                                                       |
| QC Metrics               | mapd $\leq$ 0.25; snpQC $\geq$ 15; wavinessSd $\leq$ 0.12 |

### Settings for P2\_(CytoScan750K\_Array).cy750K.cychp

| Setting Type             | Setting                                                   |
|--------------------------|-----------------------------------------------------------|
| Smoothing                | On                                                        |
| Smoothing Max Jump Limit | Off                                                       |
| Joining                  | 25 Markers, 200 kbp                                       |
| Joining Max Jump Limit   | Off                                                       |
| Restricted Mode          | Off                                                       |
| QC Metrics               | mapd $\leq$ 0.25; snpQC $\geq$ 15; wavinessSd $\leq$ 0.12 |

## Microarray Nomenclature

P9\_(CytoScan750K\_Array).cy750K.cychp:

arr[hg19] Yp11.31p11.2(2,650,424-3,988,983)x2, Yp11.2(4,433,292-6,114,035)x2, Yp11.2(7,533,004-9,161,672)x2, Yp11.2q11.21(9,775,197-14,659,536)x2, Yq11.21q11.221(14,664,141-16,347,609)x2, Yq11.221(16,626,812-19,615,902)x2, Yq11.222(21,047,209-21,807,740)x2, Yq11.223(22,243,235-23,081,333)x2, Yq11.223(23,457,351-24,094,882)x3

P4\_(CytoScan750K\_Array).cy750K.cychp:

arr[hg19] Yp11.31p11.2(2,841,954-3,284,730)x2, Yp11.2(4,312,828-5,151,567)x2, Yp11.2(7,499,027-8,522,581)x2, Yp11.2q11.21(10,073,964-14,659,536)x2, Yq11.221(16,163,421-17,235,332)x2, Yq11.222q11.223(21,975,900-22,658,601)x3, Yq11.223(23,473,313-24,111,620)x3

P11\_(CytoScan750K\_Array).cy750K.cychp:

arr[hg19] Yp11.2(5,156,574-6,101,350)x2

P12\_(CytoScan750K\_Array).cy750K.cychp:

arr[hg19] Yp11.2(5,156,574-6,114,035)x2, Yq11.221(16,611,168-17,708,022)x2, Yq11.223(24,706,354-25,564,883)x2

P13\_(CytoScan750K\_Array).cy750K.cychp:

arr[hg19] Yp11.2(5,241,451-6,109,876)x2

P7\_(CytoScan750K\_Array).cy750K.cychp:

arr[hg19] Yp11.2(5,353,490-6,114,035)x2, Yq11.223(22,243,235-22,856,440)x2

CONTROL1\_(CytoScan750K\_Array).cy750K.cychp:

arr[hg19] Yp11.2(5,393,085-6,114,035)x2, Yp11.2(6,312,529-6,743,112)x2, Yp11.2(7,518,513-8,522,581)x2, Yq11.221(16,635,210-17,301,910)x2, Yq11.222q11.223(21,975,900-22,658,601)x2, Yq11.223(23,481,485-24,119,657)x2

P5\_(CytoScan750K\_Array).cy750K.cychp:

arr[hg19] Yp11.2(5,428,860-6,114,035)x2, Yp11.2(6,599,308-7,154,126)x2, Yp11.2q11.21(9,936,435-14,659,536)x2, Yq11.222q11.223(21,961,314-22,856,440)x2

P1\_(CytoScan750K\_Array).cy750K.cychp:

arr[hg19] Yp11.2(5,629,593-6,101,350)x2, Yq11.223(22,243,235-22,856,440)x2

P2\_(CytoScan750K\_Array).cy750K.cychp:

arr[hg19] Yp11.2(5,629,593-6,101,350)x2

P10\_(CytoScan750K\_Array).cy750K.cychp:

arr[hg19] Yp11.2(5,629,593-6,109,876)x2

P8\_(CytoScan750K\_Array)(1).cy750K.cychp:  
arr[hg19] Yp11.2(5,706,584-6,114,035)x2

P6\_(CytoScan750K\_Array).cy750K.cychp:  
arr[hg19] Yp11.2(5,706,584-6,114,035)x2

CONTROL3\_(CytoScan750K\_Array).cy750K.cychp:  
arr[hg19] Yp11.2(7,518,513-8,503,687)x2, Yp11.2q11.21(10,073,964-14,586,094)x2, Yq11.222q11.223(22,003,110-22,658,601)x2, Yq11.223(23,481,485-24,118,267)x2

P16\_(CytoScan750K\_Array).cy750K.cychp:  
arr[hg19] Yq11.222(20,618,887-21,205,094)x2

P17\_(CytoScan750K\_Array).cy750K.cychp:  
arr[hg19] Yq11.223q11.23(24,741,034-27,224,389)x2, Yq11.23(27,557,915-28,105,479)x2

CONTROL5\_(CytoScan750K\_Array).cy750K.cychp:  
arr[hg19] Yq11.223q11.23(24,987,791-27,224,308)x2

CONTROL4\_(CytoScan750K\_Array).cy750K.cychp:  
arr[hg19] Yq11.223q11.23(25,838,166-26,385,352)x2

P15\_(CytoScan750K\_Array).cy750K.cychp:  
arr[hg19] Yq11.223q11.23(26,150,406-27,224,308)x2

P14\_(CytoScan750K\_Array).cy750K.cychp:  
arr[hg19] Yq11.23(26,928,074-27,514,499)x2

## Segments

| File                                    | CN State | Type | Chromosome | Cytoband Start | Size (kbp) | Marker Count | Gene Count | Genes                                | OMIM ® Genes Count | OMIM ® Genes                                                     | CytoRegions         | Call | Interpretation | Curator By | Materially Modified Segment | Microarray Nomenclature                        |
|-----------------------------------------|----------|------|------------|----------------|------------|--------------|------------|--------------------------------------|--------------------|------------------------------------------------------------------|---------------------|------|----------------|------------|-----------------------------|------------------------------------------------|
| P9_(CytoScan750K_Array)(1).cy750K.cychp | 2.00     | Gain | Y          | p11.31         | 1,339      | 208          | 5          | SRY, RPS4Y1, ZFY, LINC00278, TGIF2LY | 4                  | SRY (480000) , RPS4Y1 (470000) , ZFY (490000) , TGIF2LY (400025) | Cytoregions Not Set |      |                |            | false                       | arr[hg19] Yp11.31 p11.2(2,650,424-3,988,983)x2 |
| P4_(CytoScan750K_Array).cy750K.cychp    | 2.00     | Gain | Y          | p11.31         | 443        | 54           | 2          | ZFY, LINC00278                       | 1                  | ZFY (490000)                                                     | Cytoregions Not Set |      |                |            | false                       | arr[hg19] Yp11.31 p11.2(2,841,954-3,284,730)x2 |
| P4_(CytoScan750K_Array).cy750K.cychp    | 2.00     | Gain | Y          | p11.2          | 839        | 50           | 1          | PCDH11Y                              | 1                  | PCDH11Y (400022)                                                 | Cytoregions Not Set |      |                |            | false                       | arr[hg19] Yp11.2(4,312,828-5,151,567)x2        |
| P9_(CytoScan750K_Array)(1).cy750K.cychp | 2.00     | Gain | Y          | p11.2          | 1,681      | 160          | 3          | PCDH11Y, TTTY23, TTTY23B             | 1                  | PCDH11Y (400022)                                                 | Cytoregions Not Set |      |                |            | false                       | arr[hg19] Yp11.2(4,433,292-6,114,035)x2        |
| P11_(CytoScan750K_Array).cy750K.cychp   | 2.00     | Gain | Y          | p11.2          | 945        | 100          | 1          | PCDH11Y                              | 1                  | PCDH11Y (400022)                                                 | Cytoregions Not Set |      |                |            | false                       | arr[hg19] Yp11.2(5,156,574-6,101,350)x2        |

| File                                        | CN State | Type | Chromosome | Cytoband Start | Size (kbp) | Marker Count | Gene Count | Genes                      | OMIM ® Genes Count | OMIM ® Genes      | CytoRegions         | Call | Interpretation | Curator By | Materially Modified Segment | Microarray Nomenclature                   |
|---------------------------------------------|----------|------|------------|----------------|------------|--------------|------------|----------------------------|--------------------|-------------------|---------------------|------|----------------|------------|-----------------------------|-------------------------------------------|
| P12_(CytoScan750K_Array).cy750K.cychp       | 2.00     | Gain | Y          | p11.2          | 957        | 116          | 3          | PCDH11 Y, TTTY23, TTTY23 B | 1                  | PCDH11 Y (400022) | Cytoregions Not Set |      |                |            | false                       | arr[hg19] Yp11.2(5,156,574 - 6,114,035)x2 |
| P13_(CytoScan750K_Array).cy750K.cychp       | 2.00     | Gain | Y          | p11.2          | 868        | 99           | 1          | PCDH11 Y                   | 1                  | PCDH11 Y (400022) | Cytoregions Not Set |      |                |            | false                       | arr[hg19] Yp11.2(5,241,451 - 6,109,876)x2 |
| P7_(CytoScan750K_Array).cy750K.cychp        | 2.00     | Gain | Y          | p11.2          | 761        | 96           | 3          | PCDH11 Y, TTTY23, TTTY23 B | 1                  | PCDH11 Y (400022) | Cytoregions Not Set |      |                |            | false                       | arr[hg19] Yp11.2(5,353,490 - 6,114,035)x2 |
| CONTR OL1_(CytoScan750K_Array).cy750K.cychp | 2.00     | Gain | Y          | p11.2          | 721        | 92           | 3          | PCDH11 Y, TTTY23, TTTY23 B | 1                  | PCDH11 Y (400022) | Cytoregions Not Set |      |                |            | false                       | arr[hg19] Yp11.2(5,393,085 - 6,114,035)x2 |
| P5_(CytoScan750K_Array).cy750K.cychp        | 2.00     | Gain | Y          | p11.2          | 685        | 88           | 3          | PCDH11 Y, TTTY23, TTTY23 B | 1                  | PCDH11 Y (400022) | Cytoregions Not Set |      |                |            | false                       | arr[hg19] Yp11.2(5,428,860 - 6,114,035)x2 |
| P1_(CytoScan750K_Array).cy750K.cychp        | 2.00     | Gain | Y          | p11.2          | 472        | 52           | 0          |                            | 0                  |                   | Cytoregions Not Set |      |                |            | false                       | arr[hg19] Yp11.2(5,629,593 - 6,101,350)x2 |

| File                                        | CN State | Type | Chromosome | Cytoband Start | Size (kbp) | Marker Count | Gene Count | Genes                                                | OMIM ® Genes Count | OMIM ® Genes                                  | CytoRegions         | Call | Interpretation | Curator By | Materially Modified Segment | Microarray Nomenclature                |
|---------------------------------------------|----------|------|------------|----------------|------------|--------------|------------|------------------------------------------------------|--------------------|-----------------------------------------------|---------------------|------|----------------|------------|-----------------------------|----------------------------------------|
| P2_(CytoScan750K_Array).cy750K.cychp        | 2.00     | Gain | Y          | p11.2          | 472        | 52           | 0          |                                                      | 0                  |                                               | Cytoregions Not Set |      |                |            | false                       | arr[hg19]Yp11.2(5,629,593-6,101,350)x2 |
| P10_(CytoScan750K_Array).cy750K.cychp       | 2.00     | Gain | Y          | p11.2          | 480        | 60           | 0          |                                                      | 0                  |                                               | Cytoregions Not Set |      |                |            | false                       | arr[hg19]Yp11.2(5,629,593-6,109,876)x2 |
| P8_(CytoScan750K_Array)(1).cy750K.cychp     | 2.00     | Gain | Y          | p11.2          | 407        | 64           | 2          | TTTY23, TTTY23B                                      | 0                  |                                               | Cytoregions Not Set |      |                |            | false                       | arr[hg19]Yp11.2(5,706,584-6,114,035)x2 |
| P6_(CytoScan750K_Array).cy750K.cychp        | 2.00     | Gain | Y          | p11.2          | 407        | 64           | 2          | TTTY23, TTTY23B                                      | 0                  |                                               | Cytoregions Not Set |      |                |            | false                       | arr[hg19]Yp11.2(5,706,584-6,114,035)x2 |
| CONTR_OL1_(CytoScan750K_Array).cy750K.cychp | 2.00     | Gain | Y          | p11.2          | 431        | 72           | 7          | TTTY21B, TTTY21, TTTY7B, TTTY7, TTTY8, TTTY8B, AMELY | 1                  | AMELY (410000)                                | Cytoregions Not Set |      |                |            | false                       | arr[hg19]Yp11.2(6,312,529-6,743,112)x2 |
| P5_(CytoScan750K_Array).cy750K.cychp        | 2.00     | Gain | Y          | p11.2          | 555        | 99           | 3          | AMELY, TBL1Y, PRKY                                   | 3                  | AMELY (410000), TBL1Y (400033), PRKY (400008) | Cytoregions Not Set |      |                |            | false                       | arr[hg19]Yp11.2(6,599,308-7,154,126)x2 |

| File                                        | CN State | Type | Chromosome | Cytoband Start | Size (kbp) | Marker Count | Gene Count | Genes                                       | OMIM ® Genes Count | OMIM ® Genes | CytoRegions         | Call | Interpretation | Curator By | Materially Modified Segment | Microarray Nomenclature                        |
|---------------------------------------------|----------|------|------------|----------------|------------|--------------|------------|---------------------------------------------|--------------------|--------------|---------------------|------|----------------|------------|-----------------------------|------------------------------------------------|
| P4_(CytoScan750K_Array).cy750K.cychp        | 2.00     | Gain | Y          | p11.2          | 1,024      | 178          | 2          | TTY16, TTY12                                | 0                  |              | Cytoregions Not Set |      |                |            | false                       | arr[hg19] Yp11.2(7,499,027-8,522,581)x2        |
| CONTR OL3_(CytoScan750K_Array).cy750K.cychp | 2.00     | Gain | Y          | p11.2          | 985        | 166          | 2          | TTY16, TTY12                                | 0                  |              | Cytoregions Not Set |      |                |            | false                       | arr[hg19] Yp11.2(7,518,513-8,503,687)x2        |
| CONTR OL1_(CytoScan750K_Array).cy750K.cychp | 2.00     | Gain | Y          | p11.2          | 1,004      | 174          | 2          | TTY16, TTY12                                | 0                  |              | Cytoregions Not Set |      |                |            | false                       | arr[hg19] Yp11.2(7,518,513-8,522,581)x2        |
| P9_(CytoScan750K_Array)(1).cy750K.cychp     | 2.00     | Gain | Y          | p11.2          | 1,629      | 340          | 6          | TTY16, TTY12, TTY18, TTY19, TTY11, RBMY1A3P | 0                  |              | Cytoregions Not Set |      |                |            | false                       | arr[hg19] Yp11.2(7,533,004-9,161,672)x2        |
| P9_(CytoScan750K_Array)(1).cy750K.cychp     | 2.00     | Gain | Y          | p11.2          | 4,884      | 174          | 1          | GYG2P1                                      | 0                  |              | Cytoregions Not Set |      |                |            | false                       | arr[hg19] Yp11.2q11.21(9,775,197-14,659,536)x2 |
| P5_(CytoScan750K_Array).cy750K.cychp        | 2.00     | Gain | Y          | p11.2          | 4,723      | 144          | 1          | GYG2P1                                      | 0                  |              | Cytoregions Not Set |      |                |            | false                       | arr[hg19] Yp11.2q11.21(9,936,435-14,659,536)x2 |

| File                                           | CN State | Type | Chromosome | Cytoband Start | Size (kbp) | Marker Count | Gene Count | Genes                                         | OMIM ® Genes Count | OMIM ® Genes                                                                | CytoRegions         | Call | Interpretation | Curator By | Materially Modified Segment | Microarray Nomenclature                           |
|------------------------------------------------|----------|------|------------|----------------|------------|--------------|------------|-----------------------------------------------|--------------------|-----------------------------------------------------------------------------|---------------------|------|----------------|------------|-----------------------------|---------------------------------------------------|
| CONTR<br>OL3_(CytoScan750K_Array).cy750K.cychp | 2.00     | Gain | Y          | p11.2          | 4,512      | 76           | 1          | GYG2P1                                        | 0                  |                                                                             | Cytoregions Not Set |      |                |            | false                       | arr[hg19] Yp11.2q11.21(10,073,964-14,586,094)x2   |
| P4_(CytoScan750K_Array).cy750K.cychp           | 2.00     | Gain | Y          | p11.2          | 4,586      | 136          | 1          | GYG2P1                                        | 0                  |                                                                             | Cytoregions Not Set |      |                |            | false                       | arr[hg19] Yp11.2q11.21(10,073,964-14,659,536)x2   |
| P9_(CytoScan750K_Array)(1).cy750K.cychp        | 2.00     | Gain | Y          | q11.21         | 1,683      | 579          | 7          | TTTY15, USP9Y, DDX3Y, UTY, TMSB4Y, VCY1B, VCY | 5                  | USP9Y (400005), DDX3Y (400010), UTY (400009), TMSB4Y (400017), VCY (400012) | Cytoregions Not Set |      |                |            | false                       | arr[hg19] Yq11.21q11.221(14,664,141-16,347,609)x2 |
| P4_(CytoScan750K_Array).cy750K.cychp           | 2.00     | Gain | Y          | q11.221        | 1,072      | 200          | 4          | VCY, VCY1B, NLGN4Y, NLGN4Y-AS1                | 1                  | NLGN4Y (400028)                                                             | Cytoregions Not Set |      |                |            | false                       | arr[hg19] Yq11.221(16,163,421-17,235,332)x2       |
| P12_(CytoScan750K_Array).cy750K.cychp          | 2.00     | Gain | Y          | q11.221        | 1,097      | 100          | 2          | NLGN4Y, NLGN4Y-AS1                            | 1                  | NLGN4Y (400028)                                                             | Cytoregions Not Set |      |                |            | false                       | arr[hg19] Yq11.221(16,611,168-17,708,022)x2       |



| File                                        | CN State | Type | Chromosome | Cytoband Start | Size (kbp) | Marker Count | Gene Count | Genes                                                  | OMIM ® Genes Count | OMIM ® Genes                     | CytoRegions         | Call | Interpretation | Curator By | Materially Modified Segment | Microarray Nomenclature                           |
|---------------------------------------------|----------|------|------------|----------------|------------|--------------|------------|--------------------------------------------------------|--------------------|----------------------------------|---------------------|------|----------------|------------|-----------------------------|---------------------------------------------------|
| P9_(CytoScan750K_Array)(1).cy750K.cychp     | 2.00     | Gain | Y          | q11.221        | 2,989      | 214          | 4          | NLGN4Y , NLGN4Y-AS1, FAM41AY1, FAM41AY2                | 1                  | NLGN4Y (400028)                  | Cytoregions Not Set |      |                |            | false                       | arr[hg19]Yq11.221(16,626,812-19,615,902)x2        |
| CONTR_OL1_(CytoScan750K_Array).cy750K.cychp | 2.00     | Gain | Y          | q11.221        | 667        | 76           | 2          | NLGN4Y , NLGN4Y-AS1                                    | 1                  | NLGN4Y (400028)                  | Cytoregions Not Set |      |                |            | false                       | arr[hg19]Yq11.221(16,635,210-17,301,910)x2        |
| P16_(CytoScan750K_Array).cy750K.cychp       | 2.00     | Gain | Y          | q11.222        | 586        | 136          | 7          | HSFY2, HSFY1, TTTY9A, TTTY9B, NCRNA00185, TTTY14, CD24 | 2                  | HSFY1 (400029) , CD24 (600074)   | Cytoregions Not Set |      |                |            | false                       | arr[hg19]Yq11.222(20,618,887-21,205,094)x2        |
| P9_(CytoScan750K_Array)(1).cy750K.cychp     | 2.00     | Gain | Y          | q11.222        | 761        | 150          | 4          | TTY14, CD24, BCORP1 , TXLNG2P                          | 2                  | CD24 (600074) , TXLNG2P (400031) | Cytoregions Not Set |      |                |            | false                       | arr[hg19]Yq11.222(21,047,209-21,807,740)x2        |
| P5_(CytoScan750K_Array).cy750K.cychp        | 2.00     | Gain | Y          | q11.222        | 895        | 152          | 2          | TTY10, EIF1AY                                          | 1                  | EIF1AY (400014)                  | Cytoregions Not Set |      |                |            | false                       | arr[hg19]Yq11.222q11.223(21,961,314-22,856,440)x2 |

| File                                        | CN State | Type | Chromosome | Cytoband Start | Size (kbp) | Marker Count | Gene Count | Genes                 | OMIM ® Genes Count | OMIM ® Genes                     | CytoRegions         | Call | Interpretation | Curator By | Materially Modified Segment | Microarray Nomenclature                             |
|---------------------------------------------|----------|------|------------|----------------|------------|--------------|------------|-----------------------|--------------------|----------------------------------|---------------------|------|----------------|------------|-----------------------------|-----------------------------------------------------|
| P4_(CytoScan750K_Array).cy750K.cychp        | 3.00     | Gain | Y          | q11.222        | 683        | 104          | 1          | TTY10                 | 0                  |                                  | Cytoregions Not Set |      |                |            | false                       | arr[hg19]Yq11.22 2q11.22 3(21,975,900-22,658,601)x3 |
| CONTR OL1_(CytoScan750K_Array).cy750K.cychp | 2.00     | Gain | Y          | q11.222        | 683        | 104          | 1          | TTY10                 | 0                  |                                  | Cytoregions Not Set |      |                |            | false                       | arr[hg19]Yq11.22 2q11.22 3(21,975,900-22,658,601)x2 |
| CONTR OL3_(CytoScan750K_Array).cy750K.cychp | 2.00     | Gain | Y          | q11.222        | 655        | 98           | 1          | TTY10                 | 0                  |                                  | Cytoregions Not Set |      |                |            | false                       | arr[hg19]Yq11.22 2q11.22 3(22,003,110-22,658,601)x2 |
| P1_(CytoScan750K_Array).cy750K.cychp        | 2.00     | Gain | Y          | q11.223        | 613        | 80           | 2          | TTY10, EIF1AY         | 1                  | EIF1AY (400014)                  | Cytoregions Not Set |      |                |            | false                       | arr[hg19]Yq11.22 3(22,243,235-22,856,440)x2         |
| P7_(CytoScan750K_Array).cy750K.cychp        | 2.00     | Gain | Y          | q11.223        | 613        | 80           | 2          | TTY10, EIF1AY         | 1                  | EIF1AY (400014)                  | Cytoregions Not Set |      |                |            | false                       | arr[hg19]Yq11.22 3(22,243,235-22,856,440)x2         |
| P9_(CytoScan750K_Array)(1).cy750K.cychp     | 2.00     | Gain | Y          | q11.223        | 838        | 124          | 3          | TTY10, EIF1AY, RPS4Y2 | 2                  | EIF1AY (400014), RPS4Y2 (400030) | Cytoregions Not Set |      |                |            | false                       | arr[hg19]Yq11.22 3(22,243,235-23,081,333)x2         |

| File                                        | CN State | Type | Chromosome | Cytoband Start | Size (kbp) | Marker Count | Gene Count | Genes                                                     | OMIM ® Genes Count | OMIM ® Genes    | CytoRegions         | Call | Interpretation | Curator By | Materially Modified Segment | Microarray Nomenclature                    |
|---------------------------------------------|----------|------|------------|----------------|------------|--------------|------------|-----------------------------------------------------------|--------------------|-----------------|---------------------|------|----------------|------------|-----------------------------|--------------------------------------------|
| P9_(CytoScan750K_Array)(1).cy750K.cychp     | 3.00     | Gain | Y          | q11.223        | 638        | 108          | 6          | RBM2EP,<br>RBM1B,<br>RBM1A1,<br>RBM1D,<br>RBM1E,<br>TTY13 | 1                  | RBM1A1 (400006) | Cytoregions Not Set |      |                |            | false                       | arr[hg19]Yq11.223(23,457,351-24,094,882)x3 |
| P4_(CytoScan750K_Array).cy750K.cychp        | 3.00     | Gain | Y          | q11.223        | 638        | 126          | 6          | RBM2EP,<br>RBM1B,<br>RBM1A1,<br>RBM1D,<br>RBM1E,<br>TTY13 | 1                  | RBM1A1 (400006) | Cytoregions Not Set |      |                |            | false                       | arr[hg19]Yq11.223(23,473,313-24,111,620)x3 |
| CONTR_OL3_(CytoScan750K_Array).cy750K.cychp | 2.00     | Gain | Y          | q11.223        | 637        | 132          | 6          | RBM2EP,<br>RBM1B,<br>RBM1A1,<br>RBM1D,<br>RBM1E,<br>TTY13 | 1                  | RBM1A1 (400006) | Cytoregions Not Set |      |                |            | false                       | arr[hg19]Yq11.223(23,481,485-24,118,267)x2 |

| File                                           | CN State | Type | Chromosome | Cytoband Start | Size (kbp) | Marker Count | Gene Count | Genes                                                                                                                      | OMIM ® Genes Count | OMIM ® Genes                                                   | CytoRegions         | Call | Interpretation | Curator By | Materially Modified Segment | Microarray Nomenclature                        |
|------------------------------------------------|----------|------|------------|----------------|------------|--------------|------------|----------------------------------------------------------------------------------------------------------------------------|--------------------|----------------------------------------------------------------|---------------------|------|----------------|------------|-----------------------------|------------------------------------------------|
| CONTR<br>OL1_(CytoScan750K_Array).cy750K.cychp | 2.00     | Gain | Y          | q11.223        | 638        | 133          | 6          | RBM2E<br>P,<br>RBM1B<br>,<br>RBM1A1,<br>RBM1D,<br>RBM1E<br>,<br>TTY13                                                      | 1                  | RBM1A1<br>(400006)                                             | Cytoregions Not Set |      |                |            | false                       | arr[hg19]<br>Yq11.223(23,481,485-24,119,657)x2 |
| P12_(CytoScan750K_Array).cy750K.cychp          | 2.00     | Gain | Y          | q11.223        | 859        | 52           | 13         | TTY17B,<br>TTY17A,<br>TTY17C,<br>TTY4,<br>TTY4C,<br>TTY4B,<br>BPY2B,<br>BPY2,<br>BPY2C,<br>DAZ1,<br>DAZ4,<br>DAZ3,<br>DAZ2 | 3                  | TTY17A<br>(400040)<br>, TTY4<br>(400037)<br>, DAZ1<br>(400003) | Cytoregions Not Set |      |                |            | false                       | arr[hg19]<br>Yq11.223(24,706,354-25,564,883)x2 |

| File                                  | CN State | Type | Chromosome | Cytoband Start | Size (kbp) | Marker Count | Gene Count | Genes                                                                                                                                            | OMIM ® Genes Count | OMIM ® Genes                                                                                                                                     | CytoRegions         | Call | Interpretation | Curator By | Materially Modified Segment | Microarray Nomenclature                          |
|---------------------------------------|----------|------|------------|----------------|------------|--------------|------------|--------------------------------------------------------------------------------------------------------------------------------------------------|--------------------|--------------------------------------------------------------------------------------------------------------------------------------------------|---------------------|------|----------------|------------|-----------------------------|--------------------------------------------------|
| P17_(Cytoscan750K_Array).cy750K.cychp | 2.00     | Gain | Y          | q11.223        | 2,483      | 226          | 20         | TTY17B, TTY17A, TTY17C, TTY4, TTY4C, TTY4B, BPY2B, BPY2, BPY2C, DAZ1, DAZ4, DAZ3, DAZ2, TTY3, TTY3B, CDY1B, CDY1, CSPG4P1Y, GOLGA2P3Y, GOLGA2P2Y | 9                  | TTY17A (400040), TTY4 (400037), DAZ1 (400003), CDY1 (400016), CSPG4P1Y (400034), GOLGA2P2Y (400035), BPY2 (400013), DAZ3 (400027), DAZ2 (400026) | Cytoregions Not Set |      |                |            | false                       | arr[hg19]Yq11.223q11.23(24,741,034-27,224,389)x2 |

| File                                                   | CN State | Type | Chromosome | Cytoband Start | Size (kbp) | Marker Count | Gene Count | Genes                                                                                                                                                                                                     | OMIM ® Genes Count | OMIM ® Genes                                                                                                                                                                                        | CytoRegions         | Call | Interpretation | Curator By | Materially Modified Segment | Microarray Nomenclature                                  |
|--------------------------------------------------------|----------|------|------------|----------------|------------|--------------|------------|-----------------------------------------------------------------------------------------------------------------------------------------------------------------------------------------------------------|--------------------|-----------------------------------------------------------------------------------------------------------------------------------------------------------------------------------------------------|---------------------|------|----------------|------------|-----------------------------|----------------------------------------------------------|
| CONTR<br>OL5_(CytoScan7<br>50K_Array).cy75<br>0K.cychp | 2.00     | Gain | Y          | q11.223        | 2,237      | 202          | 20         | TTY17B,<br>TTY17A,<br>TTY17C,<br>TTY4,<br>TTY4C,<br>TTY4B,<br>BPY2B,<br>BPY2,<br>BPY2C,<br>DAZ1,<br>DAZ4,<br>DAZ3,<br>DAZ2,<br>TTY3,<br>TTY3B,<br>CDY1B,<br>CDY1,<br>CSPG4P1Y,<br>GOLGA2P3Y,<br>GOLGA2P2Y | 9                  | TTY17A<br>(400040),<br>TTY4<br>(400037),<br>DAZ1<br>(400003),<br>CDY1<br>(400016),<br>CSPG4P1Y<br>(400034),<br>GOLGA2P2Y<br>(400035),<br>BPY2<br>(400013),<br>DAZ3<br>(400027),<br>DAZ2<br>(400026) | Cytoregions Not Set |      |                |            | false                       | arr[hg19]<br>Yq11.22<br>3q11.23(24,987,791-27,224,308)x2 |
| CONTR<br>OL4_(CytoScan7<br>50K_Array).cy75<br>0K.cychp | 2.00     | Gain | Y          | q11.223        | 547        | 79           | 7          | TTY3,<br>TTY3B,<br>CDY1B,<br>CDY1,<br>CSPG4P1Y,<br>GOLGA2P3Y,<br>GOLGA2P2Y                                                                                                                                | 3                  | CDY1<br>(400016),<br>CSPG4P1Y<br>(400034),<br>GOLGA2P2Y<br>(400035)                                                                                                                                 | Cytoregions Not Set |      |                |            | false                       | arr[hg19]<br>Yq11.22<br>3q11.23(25,838,166-26,385,352)x2 |

| File                                  | CN State | Type | Chromosome | Cytoband Start | Size (kbp) | Marker Count | Gene Count | Genes                                                                                                                               | OMIM ® Genes Count | OMIM ® Genes                                                                                      | CytoRegions         | Call | Interpretation | Curator By | Materially Modified Segment | Microarray Nomenclature                          |
|---------------------------------------|----------|------|------------|----------------|------------|--------------|------------|-------------------------------------------------------------------------------------------------------------------------------------|--------------------|---------------------------------------------------------------------------------------------------|---------------------|------|----------------|------------|-----------------------------|--------------------------------------------------|
| P15_(CytoScan750K_Array).cy750K.cychp | 2.00     | Gain | Y          | q11.223        | 1,074      | 130          | 17         | CDY1B, CDY1, CSPG4P1Y, GOLGA2P3Y, GOLGA2P2Y, TTTY17B, TTTY17A, TTTY17C, TTTY4, TTTY4B, TTTY4C, BPY2, BPY2B, BPY2C, DAZ3, DAZ4, DAZ2 | 6                  | CDY1 (400016), CSPG4P1Y (400034), GOLGA2P2Y (400035), BPY2 (400013), DAZ3 (400027), DAZ2 (400026) | Cytoregions Not Set |      |                |            | false                       | arr[hg19]Yq11.223q11.23(26,150,406-27,224,308)x2 |
| P14_(CytoScan750K_Array).cy750K.cychp | 2.00     | Gain | Y          | q11.23         | 586        | 56           | 12         | DAZ3, DAZ4, DAZ2, BPY2, BPY2C, BPY2B, TTTY4C, TTTY4, TTTY4B, TTTY17B, TTTY17C, TTTY17A                                              | 2                  | DAZ3 (400027), DAZ2 (400026)                                                                      | Cytoregions Not Set |      |                |            | false                       | arr[hg19]Yq11.23(26,928,074-27,514,499)x2        |

| File                                  | CN State | Type | Chromosome | Cytoband Start | Size (kbp) | Marker Count | Gene Count | Genes                                                                                  | OMIM ® Genes Count | OMIM ® Genes     | CytoRegions         | Call | Interpretation | Curator By | Materially Modified Segment | Microarray Nomenclature                                       |
|---------------------------------------|----------|------|------------|----------------|------------|--------------|------------|----------------------------------------------------------------------------------------|--------------------|------------------|---------------------|------|----------------|------------|-----------------------------|---------------------------------------------------------------|
| P17_(Cytoscan750K_Array).cy750K.cychp | 2.00     | Gain | Y          | q11.23         | 548        | 72           | 7          | GOLGA2<br>P2Y,<br>GOLGA2<br>P3Y,<br>CSPG4P<br>1Y,<br>CDY1B,<br>CDY1,<br>TTY3,<br>TTY3B | 1                  | TTY3<br>(400036) | Cytoregions Not Set |      |                |            | false                       | arr[hg19]<br>Yq11.23(<br>27,557,9<br>15-<br>28,105,4<br>79)x2 |
