# Supplementary material
Source: PubMed Central journal article supplement (PMC6823329)
Supplement: 10815_2019_1547_MOESM7_ESM.pdf [file 10815_2019_1547_MOESM7_ESM.pdf]

## Data Files In View

| File Label                                 | File Name                                  |
|--------------------------------------------|--------------------------------------------|
| CONTROL2_(CytoScan750K_Array).cy750K.cychp | CONTROL2_(CytoScan750K_Array).cy750K.cychp |
| P10_(CytoScan750K_Array).cy750K.cychp      | P10_(CytoScan750K_Array).cy750K.cychp      |
| P12_(CytoScan750K_Array).cy750K.cychp      | P12_(CytoScan750K_Array).cy750K.cychp      |
| P14_(CytoScan750K_Array).cy750K.cychp      | P14_(CytoScan750K_Array).cy750K.cychp      |
| P15_(CytoScan750K_Array).cy750K.cychp      | P15_(CytoScan750K_Array).cy750K.cychp      |
| P16_(CytoScan750K_Array).cy750K.cychp      | P16_(CytoScan750K_Array).cy750K.cychp      |
| P18_(CytoScan750K_Array).cy750K.cychp      | P18_(CytoScan750K_Array).cy750K.cychp      |

## Settings for P14\_(CytoScan750K\_Array).cy750K.cychp

| Setting Type             | Setting             |
|--------------------------|---------------------|
| Smoothing                | On                  |
| Smoothing Max Jump Limit | Off                 |
| Joining                  | 25 Markers, 200 kbp |
| Joining Max Jump Limit   | Off                 |

| Setting Type    | Setting                                                   |
|-----------------|-----------------------------------------------------------|
| Restricted Mode | Off                                                       |
| QC Metrics      | mapd $\leq$ 0.25; snpQC $\geq$ 15; wavinessSd $\leq$ 0.12 |

### Settings for P18\_(CytoScan750K\_Array).cy750K.cychp

| Setting Type             | Setting                                                   |
|--------------------------|-----------------------------------------------------------|
| Smoothing                | On                                                        |
| Smoothing Max Jump Limit | Off                                                       |
| Joining                  | 25 Markers, 200 kbp                                       |
| Joining Max Jump Limit   | Off                                                       |
| Restricted Mode          | Off                                                       |
| QC Metrics               | mapd $\leq$ 0.25; snpQC $\geq$ 15; wavinessSd $\leq$ 0.12 |

### Settings for P16\_(CytoScan750K\_Array).cy750K.cychp

| Setting Type             | Setting                                                   |
|--------------------------|-----------------------------------------------------------|
| Smoothing                | On                                                        |
| Smoothing Max Jump Limit | Off                                                       |
| Joining                  | 25 Markers, 200 kbp                                       |
| Joining Max Jump Limit   | Off                                                       |
| Restricted Mode          | Off                                                       |
| QC Metrics               | mapd $\leq$ 0.25; snpQC $\geq$ 15; wavinessSd $\leq$ 0.12 |

### Settings for P12\_(CytoScan750K\_Array).cy750K.cychp

| Setting Type | Setting |
|--------------|---------|
| Smoothing    | On      |

| Setting Type             | Setting                                                   |
|--------------------------|-----------------------------------------------------------|
| Smoothing Max Jump Limit | Off                                                       |
| Joining                  | 25 Markers, 200 kbp                                       |
| Joining Max Jump Limit   | Off                                                       |
| Restricted Mode          | Off                                                       |
| QC Metrics               | mapd $\leq$ 0.25; snpQC $\geq$ 15; wavinessSd $\leq$ 0.12 |

### Settings for CONTROL2\_(CytoScan750K\_Array).cy750K.cychp

| Setting Type             | Setting                                                   |
|--------------------------|-----------------------------------------------------------|
| Smoothing                | On                                                        |
| Smoothing Max Jump Limit | Off                                                       |
| Joining                  | 25 Markers, 200 kbp                                       |
| Joining Max Jump Limit   | Off                                                       |
| Restricted Mode          | Off                                                       |
| QC Metrics               | mapd $\leq$ 0.25; snpQC $\geq$ 15; wavinessSd $\leq$ 0.12 |

### Settings for P15\_(CytoScan750K\_Array).cy750K.cychp

| Setting Type             | Setting                                                   |
|--------------------------|-----------------------------------------------------------|
| Smoothing                | On                                                        |
| Smoothing Max Jump Limit | Off                                                       |
| Joining                  | 25 Markers, 200 kbp                                       |
| Joining Max Jump Limit   | Off                                                       |
| Restricted Mode          | Off                                                       |
| QC Metrics               | mapd $\leq$ 0.25; snpQC $\geq$ 15; wavinessSd $\leq$ 0.12 |

## Settings for P10\_(CytoScan750K\_Array).cy750K.cychp

| Setting Type             | Setting                                                   |
|--------------------------|-----------------------------------------------------------|
| Smoothing                | On                                                        |
| Smoothing Max Jump Limit | Off                                                       |
| Joining                  | 25 Markers, 200 kbp                                       |
| Joining Max Jump Limit   | Off                                                       |
| Restricted Mode          | Off                                                       |
| QC Metrics               | mapd $\leq$ 0.25; snpQC $\geq$ 15; wavinessSd $\leq$ 0.12 |

## Microarray Nomenclature

P16\_(CytoScan750K\_Array).cy750K.cychp:  
arr[hg19] 3p21.31p14.3(45,644,290-54,647,638) hmz

P12\_(CytoScan750K\_Array).cy750K.cychp:  
arr[hg19] 3p21.31p21.1(46,599,983-53,111,069) hmz

P15\_(CytoScan750K\_Array).cy750K.cychp:  
arr[hg19] 3p21.31p21.1(46,666,952-53,004,604) hmz

P18\_(CytoScan750K\_Array).cy750K.cychp:  
arr[hg19] 3p21.31p21.2(46,678,294-52,291,735) hmz

P10\_(CytoScan750K\_Array).cy750K.cychp:  
arr[hg19] 3p21.31p21.1(46,678,984-52,821,011) hmz

P14\_(CytoScan750K\_Array).cy750K.cychp:  
arr[hg19] 3p21.31p21.1(46,745,395-52,927,228) hmz

## Segments

| File                                  | CN State | Type | Chromosome | Cytoband Start | Size (kbp) | Marker Count | Gene Count | Genes                                                                                                                                                                                                                                                                           | OMIM ® Genes Count | OMIM ® Genes                                                                                                                                                                                                                                                                                                      | CytoRegions         | Call | Interpretation | Curator By | Materially Modified Segment | Microarray Nomenclature |                                                   |
|---------------------------------------|----------|------|------------|----------------|------------|--------------|------------|---------------------------------------------------------------------------------------------------------------------------------------------------------------------------------------------------------------------------------------------------------------------------------|--------------------|-------------------------------------------------------------------------------------------------------------------------------------------------------------------------------------------------------------------------------------------------------------------------------------------------------------------|---------------------|------|----------------|------------|-----------------------------|-------------------------|---------------------------------------------------|
| P16_(Cytoscan750K_Array).cy750K.cychp |          | LOH  | 3          | p21.31         | 9,003      | 403          | 205        | LIMD1, LIMD1-AS1, SACM1L, SLC6A20, LZTFL1, CCR9, FYCO1, CXCR6, XCR1, CCR1, CCR3, CCR2, CCR5, CCRL2, LTF, RTP3, LRRC2, LRRC2-AS1, TDGF1, LOC100132146, ALS2CL, TMIE, PRSS50, PRSS46, PRSS45, PRSS42, MYL3, PTH1R, CCDC12, NBEAL2, NRADDP, SETD2, KIF9-AS1, KIF9, KLHL18, PTPN23, | 135                | LIMD1 (604543), SACM1L (606569), SLC6A20 (605616), LZTFL1 (606568), CCR9 (604738), FYCO1 (607182), CXCR6 (605163), XCR1 (600552), CCR1 (601159), CCR3 (601268), CCR2 (601267), CCR5 (601373), CCRL2 (608379), LTF (150210), RTP3 (607181), LRRC2 (607180), TDGF1 (187395), ALS2CL (612402), TMIE (607237), PRSS50 | Cytoregions Not Set |      |                |            |                             | false                   | arr[hg19]3p21.31p14.3(45,644,290-54,647,638) h mz |

| File | CN State | Type | Chromosome | Cytoband Start | Size (kbp) | Marker Count | Gene Count | Genes                                                                                                                                                                                                                                                                                                                                                                                         | OMIM ® Genes Count | OMIM ® Genes                                                                                                                                                                                                                                                                                                                                                                                                                                            | CytoRegions | Call | Interpretation | Curator By | Materially Modified Segment | Microarray Nomenclature |
|------|----------|------|------------|----------------|------------|--------------|------------|-----------------------------------------------------------------------------------------------------------------------------------------------------------------------------------------------------------------------------------------------------------------------------------------------------------------------------------------------------------------------------------------------|--------------------|---------------------------------------------------------------------------------------------------------------------------------------------------------------------------------------------------------------------------------------------------------------------------------------------------------------------------------------------------------------------------------------------------------------------------------------------------------|-------------|------|----------------|------------|-----------------------------|-------------------------|
|      |          |      |            |                |            |              |            | PTPN23,<br>SCAP,<br>ELP6,<br>CSPG5,<br>SMARCC1,<br>DHX30,<br>MIR1226<br>, MAP4,<br>CDC25A<br>,<br>MIR4443<br>, CAMP,<br>ZNF589,<br>NME6,<br>SPINK8,<br>FBXW12<br>,<br>PLXNB1,<br>CCDC51<br>, TMA7,<br>ATRIP,<br>TRESX1,<br>SHISA5,<br>PFKFB4,<br>UCN2,<br>COL7A1,<br>MIR711,<br>UQCRC1,<br>TMEM89<br>,<br>SLC26A6,<br>CELSR3<br>,<br>MIR4793<br>,<br>NCKIPSD,<br>IP6K2,<br>PRKAR2A,<br>SLC25A |                    | PRSS50<br>(607950)<br>, MYL3<br>(160790)<br>, PTH1R<br>(168468)<br>,<br>NBEAL2<br>(614169)<br>, SETD2<br>(612778)<br>, KIF9<br>(607910)<br>,<br>PTPN23<br>(606584)<br>, SCAP<br>(601510)<br>, ELP6<br>(615020)<br>, CSPG5<br>(606775)<br>,<br>SMARCC1<br>(601732)<br>, MAP4<br>(157132)<br>,<br>CDC25A<br>(116947)<br>, CAMP<br>(600474)<br>, NME6<br>(608294)<br>,<br>FBXW12<br>(609075)<br>,<br>PLXNB1<br>(601053)<br>, ATRIP<br>(606605)<br>, TRESX1 |             |      |                |            |                             |                         |

| File | CN State | Type | Chromosome | Cytoband Start | Size (kbp) | Marker Count | Gene Count | Genes                                                                                                                                                                                                                                                                                                                                                            | OMIM ® Genes Count | OMIM ® Genes                                                                                                                                                                                                                                                                                                              | CytoRegions | Call | Interpretation | Curator By | Materially Modified Segment | Microarray Nomenclature |
|------|----------|------|------------|----------------|------------|--------------|------------|------------------------------------------------------------------------------------------------------------------------------------------------------------------------------------------------------------------------------------------------------------------------------------------------------------------------------------------------------------------|--------------------|---------------------------------------------------------------------------------------------------------------------------------------------------------------------------------------------------------------------------------------------------------------------------------------------------------------------------|-------------|------|----------------|------------|-----------------------------|-------------------------|
|      |          |      |            |                |            |              |            | SLC25A20,<br>ARIH20S,<br>ARIH2,<br>P4HTM,<br>WDR6,<br>DALRD3,<br>MIR425,<br>NDUFAF3,<br>MIR191,<br>IMPDH2,<br>QRICH1,<br>QARS,<br>USP19,<br>LAMB2,<br>LAMB2P1,<br>CCDC71,<br>KLHDC8B,<br>LOC646498,<br>CCDC36,<br>C3orf62,<br>MIR4271,<br>USP4,<br>GPX1,<br>RHOA,<br>TCTA,<br>AMT,<br>NICN1,<br>DAG1,<br>BSN-AS2,<br>BSN,<br>APEH,<br>MST1,<br>RNF123,<br>AMIGO3 |                    | , TREX1 (606609)<br>, SHISA5 (607290)<br>, PFKFB4 (605320)<br>, UCN2 (605902)<br>, COL7A1 (120120)<br>, UQCRC1 (191328)<br>, SLC26A6 (610068)<br>, CELSR3 (604264)<br>, NCKIPSD (606671)<br>, IP6K2 (606992)<br>, PRKAR2A (176910)<br>, SLC25A20 (613698)<br>, ARIH2 (605615)<br>, P4HTM (614584)<br>, WDR6 (606031)<br>, |             |      |                |            |                             |                         |

| File | CN State | Type | Chromosome | Cytoband Start | Size (kb) | Marker Count | Gene Count | Genes                                                                                                                                                                                                                                                                                                                                                                                                            | OMIM ® Genes Count | OMIM ® Genes                                                                                                                                                                                                                                                                                                                                                                                                                                                     | CytoRegions | Call | Interpretation | Curator By | Materially Modified Segment | Microarray Nomenclature |
|------|----------|------|------------|----------------|-----------|--------------|------------|------------------------------------------------------------------------------------------------------------------------------------------------------------------------------------------------------------------------------------------------------------------------------------------------------------------------------------------------------------------------------------------------------------------|--------------------|------------------------------------------------------------------------------------------------------------------------------------------------------------------------------------------------------------------------------------------------------------------------------------------------------------------------------------------------------------------------------------------------------------------------------------------------------------------|-------------|------|----------------|------------|-----------------------------|-------------------------|
|      |          |      |            |                |           |              |            | AMIGO3<br>,<br>GMPPB,<br>IP6K1,<br>CDHR4,<br>FAM212<br>A, UBA7,<br>MIR5193<br>, TRAI,<br>CAMKV,<br>MST1R,<br>MON1A,<br>RBM6,<br>RBM5,<br>RBM5-<br>AS1,<br>SEMA3F<br>,<br>GNAT1,<br>SLC38A<br>3,<br>GNAI2,<br>SEMA3B<br>,<br>LSMEM2<br>, IFRD2,<br>HYAL3,<br>NAT6,<br>HYAL1,<br>HYAL2,<br>TUSC2,<br>RASSF1<br>,<br>ZMYND1<br>0,<br>NPRL2,<br>CYB561<br>D2,<br>TMEM11<br>5,<br>CACNA2<br>D2,<br>C3orf18,<br>HEMK1, |                    | ,<br>NDUFAF<br>3<br>(612911)<br>, MIR191<br>(615150)<br>,<br>IMPDH2<br>(146691)<br>, QARS<br>(603727)<br>, USP19<br>(614471)<br>, LAMB2<br>(150325)<br>,<br>KLHDC8<br>B<br>(613169)<br>, USP4<br>(603486)<br>, GPX1<br>(138320)<br>, RHOA<br>(165390)<br>, TCTA<br>(600690)<br>, AMT<br>(238310)<br>, NICN1<br>(611516)<br>, DAG1<br>(128239)<br>, BSN<br>(604020)<br>, APEH<br>(102645)<br>, MST1<br>(142408)<br>,<br>RNF123<br>(614472)<br>, IP6K1<br>(606991) |             |      |                |            |                             |                         |



| File | CN State | Type | Chromosome | Cytoband Start | Size (kbp) | Marker Count | Gene Count | Genes                                                                                                                                                                                                                                                                                                                                                                                                              | OMIM ® Genes Count | OMIM ® Genes                                                                                                                                                                                                                                                                                                                                                                                                                                                                  | CytoRegions | Call | Interpretation | Curator By | Materially Modified Segment | Microarray Nomenclature |
|------|----------|------|------------|----------------|------------|--------------|------------|--------------------------------------------------------------------------------------------------------------------------------------------------------------------------------------------------------------------------------------------------------------------------------------------------------------------------------------------------------------------------------------------------------------------|--------------------|-------------------------------------------------------------------------------------------------------------------------------------------------------------------------------------------------------------------------------------------------------------------------------------------------------------------------------------------------------------------------------------------------------------------------------------------------------------------------------|-------------|------|----------------|------------|-----------------------------|-------------------------|
|      |          |      |            |                |            |              |            | HEMK1,<br>CISH,<br>MAPKA<br>PK3,<br>MIR4787<br>,<br>DOCK3,<br>MANF,<br>RBM15B<br>,<br>VPRBP,<br>RAD54L<br>2,<br>TEX264,<br>GRM2,<br>IQCF6,<br>IQCF4,<br>IQCF3,<br>IQCF2,<br>IQCF5,<br>IQCF1,<br>RRP9,<br>PARP3,<br>GPR62,<br>PCBP4,<br>ABHD14<br>B,<br>ABHD14<br>A,<br>ABHD14<br>A-ACY1,<br>ACY1,<br>RPL29,<br>DUSP7,<br>LINC006<br>96,<br>POC1A,<br>ALAS1,<br>TLR9,<br>TWF2,<br>PPM1M,<br>WDR82,<br>MIRLET<br>7G, |                    | (606991)<br>, UBA7<br>(191325)<br>, TRAI<br>(605958)<br>, CAMKV<br>(614993)<br>, MST1R<br>(600168)<br>, MON1A<br>(611464)<br>, RBM6<br>(606886)<br>, RBM5<br>(606884)<br>,<br>SEMA3F<br>(601124)<br>, GNAT1<br>(139330)<br>,<br>SLC38A<br>3<br>(604437)<br>, GNAI2<br>(139360)<br>,<br>SEMA3B<br>(601281)<br>, IFRD2<br>(602725)<br>, HYAL3<br>(604038)<br>, NAT6<br>(607073)<br>, HYAL1<br>(607071)<br>, HYAL2<br>(603551)<br>, TUSC2<br>(607052)<br>,<br>RASSF1<br>(605082) |             |      |                |            |                             |                         |

| File | CN State | Type | Chromosome | Cytoband Start | Size (kb) | Marker Count | Gene Count | Genes                                                                                                                                                                                                                                                                                                                                                                                             | OMIM ® Genes Count | OMIM ® Genes                                                                                                                                                                                                                                                                                                                                                                                                                             | CytoRegions | Call | Interpretation | Curator By | Materially Modified Segment | Microarray Nomenclature |
|------|----------|------|------------|----------------|-----------|--------------|------------|---------------------------------------------------------------------------------------------------------------------------------------------------------------------------------------------------------------------------------------------------------------------------------------------------------------------------------------------------------------------------------------------------|--------------------|------------------------------------------------------------------------------------------------------------------------------------------------------------------------------------------------------------------------------------------------------------------------------------------------------------------------------------------------------------------------------------------------------------------------------------------|-------------|------|----------------|------------|-----------------------------|-------------------------|
|      |          |      |            |                |           |              |            | 7G,<br>GLYCTK<br>,<br>MIR135<br>A1,<br>DNAH1,<br>BAP1,<br>PHF7,<br>SEMA3<br>G,<br>TNNC1,<br>NISCH,<br>STAB1,<br>NT5DC2<br>, SMIM4,<br>PBRM1,<br>GNL3,<br>SNORD<br>19,<br>SNORD<br>19B,<br>SNORD<br>69,<br>GLT8D1,<br>SPCS1,<br>NEK4,<br>ITIH1,<br>ITIH3,<br>ITIH4,<br>MUSTN1<br>,<br>TMEM11<br>0-<br>MUSTN1<br>,<br>TMEM11<br>0,<br>SFMBT1<br>, RFT1,<br>PRKCD,<br>TKT,<br>DCP1A,<br>CACNA1<br>D, |                    | (605082)<br>,<br>ZMYND1<br>0<br>(607070)<br>, NPRL2<br>(607072)<br>,<br>CYB561<br>D2<br>(607068)<br>,<br>TMEM11<br>5<br>(607069)<br>,<br>CACNA2<br>D2<br>(607082)<br>, CISH<br>(602441)<br>,<br>MAPKA<br>PK3<br>(602130)<br>, DOCK3<br>(603123)<br>, MANF<br>(601916)<br>,<br>RBM15B<br>(612602)<br>, GRM2<br>(604099)<br>, PARP3<br>(607726)<br>, GPR62<br>(606917)<br>, PCBP4<br>(608503)<br>, ACY1<br>(104620)<br>, RPL29<br>(601832) |             |      |                |            |                             |                         |

| File | CN State | Type | Chromosome | Cytoband Start | Size (kbp) | Marker Count | Gene Count | Genes                                                     | OMIM ® Genes Count | OMIM ® Genes                                                                                                                                                                                                                                                                                                                                                                                                                                                                                  | CytoRegions | Call | Interpretation | Curator By | Materially Modified Segment | Microarray Nomenclature |  |
|------|----------|------|------------|----------------|------------|--------------|------------|-----------------------------------------------------------|--------------------|-----------------------------------------------------------------------------------------------------------------------------------------------------------------------------------------------------------------------------------------------------------------------------------------------------------------------------------------------------------------------------------------------------------------------------------------------------------------------------------------------|-------------|------|----------------|------------|-----------------------------|-------------------------|--|
|      |          |      |            |                |            |              |            | D,<br>CHDH,<br>IL17RB,<br>ACTR8,<br>SELK,<br>CACNA2<br>D3 |                    | (601832)<br>, DUSP7<br>(602749)<br>, POC1A<br>(614783)<br>, ALAS1<br>(125290)<br>, TLR9<br>(605474)<br>, TWF2<br>(607433)<br>, PPM1M<br>(608979)<br>, WDR82<br>(611059)<br>,<br>MIRLET<br>7G<br>(612102)<br>,<br>GLYCTK<br>(610516)<br>, DNAH1<br>(603332)<br>, BAP1<br>(603089)<br>, TNNC1<br>(191040)<br>, STAB1<br>(608560)<br>, PBRM1<br>(606083)<br>, GNL3<br>(608011)<br>, SPCS1<br>(610358)<br>, NEK4<br>(601959)<br>, ITIH1<br>(147270)<br>, ITIH3<br>(146650)<br>, ITIH4<br>(600564) |             |      |                |            |                             |                         |  |

| File | CN State | Type | Chromosome | Cytoband Start | Size (kbp) | Marker Count | Gene Count | Genes | OMIM ® Genes Count | OMIM ® Genes                                                                                                                                                                                                                     | CytoRegions | Call | Interpretation | Curator By | Materially Modified Segment | Microarray Nomenclature |
|------|----------|------|------------|----------------|------------|--------------|------------|-------|--------------------|----------------------------------------------------------------------------------------------------------------------------------------------------------------------------------------------------------------------------------|-------------|------|----------------|------------|-----------------------------|-------------------------|
|      |          |      |            |                |            |              |            |       |                    | (600564)<br>,<br>SFMBT1<br>(607319)<br>, RFT1<br>(611908)<br>, PRKCD<br>(176977)<br>, TKT<br>(606781)<br>, DCP1A<br>(607010)<br>,<br>CACNA1D<br>(114206)<br>, IL17RB<br>(605458)<br>, -<br>(607916)<br>,<br>CACNA2D3<br>(606399) |             |      |                |            |                             |                         |

| File                                  | CN State | Type | Chromosome | Cytoband Start | Size (kbp) | Marker Count | Gene Count | Genes                                                                                                                                                                                                                                                                                 | OMIM ® Genes Count | OMIM ® Genes                                                                                                                                                                                                                                                                                         | CytoRegions         | Call | Interpretation | Curator By | Materially Modified Segment | Microarray Nomenclature                          |
|---------------------------------------|----------|------|------------|----------------|------------|--------------|------------|---------------------------------------------------------------------------------------------------------------------------------------------------------------------------------------------------------------------------------------------------------------------------------------|--------------------|------------------------------------------------------------------------------------------------------------------------------------------------------------------------------------------------------------------------------------------------------------------------------------------------------|---------------------|------|----------------|------------|-----------------------------|--------------------------------------------------|
| P12_(Cytoscan750K_Array).cy750K.cychp |          | LOH  | 3          | p21.31         | 6,511      | 212          | 179        | LRRC2, LRRC2-AS1, TDGF1, LOC100132146, ALS2CL, TMIE, PRSS50, PRSS46, PRSS45, PRSS42, MYL3, PTH1R, CCDC12, NBEAL2, NRADD, SETD2, KIF9-AS1, KIF9, KLHL18, PTPN23, SCAP, ELP6, CSPG5, SMARCC1, DHX30, MIR1226, MAP4, CDC25A, MIR4443, CAMP, ZNF589, NME6, SPINK8, FBXW12, PLXNB1, CCDC51 | 112                | LRRC2 (607180), TDGF1 (187395), ALS2CL (612402), TMIE (607237), PRSS50 (607950), MYL3 (160790), PTH1R (168468), NBEAL2 (614169), SETD2 (612778), KIF9 (607910), PTPN23 (606584), SCAP (601510), ELP6 (615020), CSPG5 (606775), SMARCC1 (601732), MAP4 (157132), CDC25A (116947), CAMP (600474), NME6 | Cytoregions Not Set |      |                |            | false                       | arr[hg19]3p21.31p21.1(46,599,983-53,111,069) hmz |

| File | CN State | Type | Chromosome | Cytoband Start | Size (kbp) | Marker Count | Gene Count | Genes                                                                                                                                                                                                                                                     | OMIM ® Genes Count | OMIM ® Genes                                                                                                                                                                                                                                                 | CytoRegions | Call | Interpretation | Curator By | Materially Modified Segment | Microarray Nomenclature |  |
|------|----------|------|------------|----------------|------------|--------------|------------|-----------------------------------------------------------------------------------------------------------------------------------------------------------------------------------------------------------------------------------------------------------|--------------------|--------------------------------------------------------------------------------------------------------------------------------------------------------------------------------------------------------------------------------------------------------------|-------------|------|----------------|------------|-----------------------------|-------------------------|--|
|      |          |      |            |                |            |              |            | CCDC51, TMA7, ATRIP, TREX1, SHISA5, PFKFB4, UCN2, COL7A1, MIR711, UQCRC1, TMEM89, SLC26A6, CELSR3, MIR4793, NCKIPSD, IP6K2, PRKAR2A, SLC25A20, ARIH2OS, ARIH2, P4HTM, WDR6, DALRD3, MIR425, NDUFAF3, MIR191, IMPDH2, QRICH1, QARS, USP19, LAMB2, LAMB2P1, |                    | , NME6 (608294), FBXW12 (609075), PLXNB1 (601053), ATRIP (606605), TREX1 (606609), SHISA5 (607290), PFKFB4 (605320), UCN2 (605902), COL7A1 (120120), UQCRC1 (191328), SLC26A6 (610068), CELSR3 (604264), NCKIPSD (606671), IP6K2 (606992), PRKAR2A (176910), |             |      |                |            |                             |                         |  |

| File | CN State | Type | Chromosome | Cytoband Start | Size (kb) | Marker Count | Gene Count | Genes                                                                                                                                                                                                                                                                                                                                                                                                               | OMIM ® Genes Count | OMIM ® Genes                                                                                                                                                                                                                                                                                                                                                                                                                                                                                             | CytoRegions | Call | Interpretation | Curator By | Materially Modified Segment | Microarray Nomenclature |
|------|----------|------|------------|----------------|-----------|--------------|------------|---------------------------------------------------------------------------------------------------------------------------------------------------------------------------------------------------------------------------------------------------------------------------------------------------------------------------------------------------------------------------------------------------------------------|--------------------|----------------------------------------------------------------------------------------------------------------------------------------------------------------------------------------------------------------------------------------------------------------------------------------------------------------------------------------------------------------------------------------------------------------------------------------------------------------------------------------------------------|-------------|------|----------------|------------|-----------------------------|-------------------------|
|      |          |      |            |                |           |              |            | 1,<br>CCDC71<br>,<br>KLHDC8<br>B,<br>LOC646<br>498,<br>CCDC36<br>,<br>C3orf62,<br>MIR4271<br>,<br>USP4,<br>GPX1,<br>RHOA,<br>TCTA,<br>AMT,<br>NICN1,<br>DAG1,<br>BSN-<br>AS2,<br>BSN,<br>APEH,<br>MST1,<br>RNF123,<br>AMIGO3<br>,<br>GMPPB,<br>IP6K1,<br>CDHR4,<br>FAM212<br>A, UBA7,<br>MIR5193<br>,<br>TRAIP,<br>CAMKV,<br>MST1R,<br>MON1A,<br>RBM6,<br>RBM5,<br>RBM5-<br>AS1,<br>SEMA3F<br>,<br>GNAT1,<br>SLC38A |                    | ,<br>SLC25A<br>20<br>(613698)<br>,<br>ARIH2<br>(605615)<br>,<br>P4HTM<br>(614584)<br>,<br>WDR6<br>(606031)<br>,<br>NDUFAF<br>3<br>(612911)<br>,<br>MIR191<br>(615150)<br>,<br>IMPDH2<br>(146691)<br>,<br>QARS<br>(603727)<br>,<br>USP19<br>(614471)<br>,<br>LAMB2<br>(150325)<br>,<br>KLHDC8<br>B<br>(613169)<br>,<br>USP4<br>(603486)<br>,<br>GPX1<br>(138320)<br>,<br>RHOA<br>(165390)<br>,<br>TCTA<br>(600690)<br>,<br>AMT<br>(238310)<br>,<br>NICN1<br>(611516)<br>,<br>DAG1<br>(128239)<br>,<br>BSN |             |      |                |            |                             |                         |

| File | CN State | Type | Chromosome | Cytoband Start | Size (kbp) | Marker Count | Gene Count | Genes                                                                                                                                                                                                                                                                                                                                                        | OMIM ® Genes Count | OMIM ® Genes                                                                                                                                                                                                                                                                                                                                                                                                         | CytoRegions | Call | Interpretation | Curator By | Materially Modified Segment | Microarray Nomenclature |
|------|----------|------|------------|----------------|------------|--------------|------------|--------------------------------------------------------------------------------------------------------------------------------------------------------------------------------------------------------------------------------------------------------------------------------------------------------------------------------------------------------------|--------------------|----------------------------------------------------------------------------------------------------------------------------------------------------------------------------------------------------------------------------------------------------------------------------------------------------------------------------------------------------------------------------------------------------------------------|-------------|------|----------------|------------|-----------------------------|-------------------------|
|      |          |      |            |                |            |              |            | SLC38A3,<br>GNAI2,<br>SEMA3B,<br>LSMEM2,<br>IFRD2,<br>HYAL3,<br>NAT6,<br>HYAL1,<br>HYAL2,<br>TUSC2,<br>RASSF1,<br>ZMYND10,<br>NPRL2,<br>CYB561D2,<br>TMEM115,<br>CACNA2D2,<br>C3orf18,<br>HEMK1,<br>CISH,<br>MAPKAPK3,<br>MIR4787,<br>DOCK3,<br>MANF,<br>RBM15B,<br>VPRBP,<br>RAD54L2,<br>TEX264,<br>GRM2,<br>IQCF6,<br>IQCF4,<br>IQCF3,<br>IQCF2,<br>IQCF5, |                    | , BSN (604020),<br>, APEH (102645),<br>, MST1 (142408),<br>, RNF123 (614472),<br>, IP6K1 (606991),<br>, UBA7 (191325),<br>, TRAIIP (605958),<br>, CAMKV (614993),<br>, MST1R (600168),<br>, MON1A (611464),<br>, RBM6 (606886),<br>, RBM5 (606884),<br>, SEMA3F (601124),<br>, GNAT1 (139330),<br>, SLC38A3 (604437),<br>, GNAI2 (139360),<br>, SEMA3B (601281),<br>, IFRD2 (602725),<br>, HYAL3 (604038),<br>, NAT6 |             |      |                |            |                             |                         |



| File | CN State | Type | Chromosome | Cytoband Start | Size (kbp) | Marker Count | Gene Count | Genes                                                                                                                                                                                                                                                                                                                                                                                                             | OMIM ® Genes Count | OMIM ® Genes                                                                                                                                                                                                                                                                                                                                                                                                                     | CytoRegions | Call | Interpretation | Curator By | Materially Modified Segment | Microarray Nomenclature |
|------|----------|------|------------|----------------|------------|--------------|------------|-------------------------------------------------------------------------------------------------------------------------------------------------------------------------------------------------------------------------------------------------------------------------------------------------------------------------------------------------------------------------------------------------------------------|--------------------|----------------------------------------------------------------------------------------------------------------------------------------------------------------------------------------------------------------------------------------------------------------------------------------------------------------------------------------------------------------------------------------------------------------------------------|-------------|------|----------------|------------|-----------------------------|-------------------------|
|      |          |      |            |                |            |              |            | IQCF5,<br>IQCF1,<br>RRP9,<br>PARP3,<br>GPR62,<br>PCBP4,<br>ABHD14<br>B,<br>ABHD14<br>A,<br>ABHD14<br>A-ACY1,<br>ACY1,<br>RPL29,<br>DUSP7,<br>LINC006<br>96,<br>POC1A,<br>ALAS1,<br>TLR9,<br>TWf2,<br>PPM1M,<br>WDR82,<br>MIRLET<br>7G,<br>GLYCTK<br>,<br>MIR135<br>A1,<br>DNAH1,<br>BAP1,<br>PHF7,<br>SEMA3<br>G,<br>TNNC1,<br>NISCH,<br>STAB1,<br>NT5DC2<br>, SMIM4,<br>PBRM1,<br>GNL3,<br>SNORD<br>19,<br>SNORD |                    | , NAT6<br>(607073)<br>, HYAL1<br>(607071)<br>, HYAL2<br>(603551)<br>, TUSC2<br>(607052)<br>,<br>RASSF1<br>(605082)<br>,<br>ZMYND1<br>0<br>(607070)<br>, NPRL2<br>(607072)<br>,<br>CYB561<br>D2<br>(607068)<br>,<br>TMEM11<br>5<br>(607069)<br>,<br>CACNA2<br>D2<br>(607082)<br>, CISH<br>(602441)<br>,<br>MAPKA<br>PK3<br>(602130)<br>, DOCK3<br>(603123)<br>, MANF<br>(601916)<br>,<br>RBM15B<br>(612602)<br>, GRM2<br>(604099) |             |      |                |            |                             |                         |

| File | CN State | Type | Chromosome | Cytoband Start | Size (kb) | Marker Count | Gene Count | Genes                                                                                                                                     | OMIM ® Genes Count | OMIM ® Genes                                                                                                                                                                                                                                                                                                                                                                                        | CytoRegions | Call | Interpretation | Curator By | Materially Modified Segment | Microarray Nomenclature |
|------|----------|------|------------|----------------|-----------|--------------|------------|-------------------------------------------------------------------------------------------------------------------------------------------|--------------------|-----------------------------------------------------------------------------------------------------------------------------------------------------------------------------------------------------------------------------------------------------------------------------------------------------------------------------------------------------------------------------------------------------|-------------|------|----------------|------------|-----------------------------|-------------------------|
|      |          |      |            |                |           |              |            | SNORD19B,<br>SNORD69,<br>GLT8D1,<br>SPCS1,<br>NEK4,<br>ITIH1,<br>ITIH3,<br>ITIH4,<br>MUSTN1,<br>TMEM110-<br>MUSTN1,<br>TMEM110,<br>SFMBT1 |                    | (604099),<br>PARP3 (607726),<br>GPR62 (606917),<br>PCBP4 (608503),<br>ACY1 (104620),<br>RPL29 (601832),<br>DUSP7 (602749),<br>POC1A (614783),<br>ALAS1 (125290),<br>TLR9 (605474),<br>TWF2 (607433),<br>PPM1M (608979),<br>WDR82 (611059),<br>MIRLET7G (612102),<br>GLYCTK (610516),<br>DNAH1 (603332),<br>BAP1 (603089),<br>TNNC1 (191040),<br>STAB1 (608560),<br>PBRM1 (606083),<br>GNL3 (608011) |             |      |                |            |                             |                         |

| File | CN State | Type | Chromosome | Cytoband Start | Size (kb) | Marker Count | Gene Count | Genes | OMIM ® Genes Count | OMIM ® Genes                                                                                                                                          | CytoRegions | Call | Interpretation | Curator By | Materially Modified Segment | Microarray Nomenclature |
|------|----------|------|------------|----------------|-----------|--------------|------------|-------|--------------------|-------------------------------------------------------------------------------------------------------------------------------------------------------|-------------|------|----------------|------------|-----------------------------|-------------------------|
|      |          |      |            |                |           |              |            |       |                    | (608011)<br>, SPCS1<br>(610358)<br>, NEK4<br>(601959)<br>, ITIH1<br>(147270)<br>, ITIH3<br>(146650)<br>, ITIH4<br>(600564)<br>,<br>SFMBT1<br>(607319) |             |      |                |            |                             |                         |

| File                                  | CN State | Type | Chromosome | Cytoband Start | Size (kbp) | Marker Count | Gene Count | Genes                                                                                                                                                                                                                                                                                     | OMIM ® Genes Count | OMIM ® Genes                                                                                                                                                                                                                                                                                    | CytoRegions         | Call | Interpretation | Curator By | Materially Modified Segment | Microarray Nomenclature |                                                  |
|---------------------------------------|----------|------|------------|----------------|------------|--------------|------------|-------------------------------------------------------------------------------------------------------------------------------------------------------------------------------------------------------------------------------------------------------------------------------------------|--------------------|-------------------------------------------------------------------------------------------------------------------------------------------------------------------------------------------------------------------------------------------------------------------------------------------------|---------------------|------|----------------|------------|-----------------------------|-------------------------|--------------------------------------------------|
| P15_(Cytoscan750K_Array).cy750K.cychp |          | LOH  | 3          | p21.31         | 6,338      | 195          | 176        | LOC100132146, ALS2CL, TMIE, PRSS50, PRSS46, PRSS45, PRSS42, MYL3, PTH1R, CCDC12, NBEAL2, NRADDP, SETD2, KIF9AS1, KIF9, KLHL18, PTPN23, SCAP, ELP6, CSPG5, SMARCC1, DHX30, MIR1226, MAP4, CDC25A, MIR4443, CAMP, ZNF589, NME6, SPINK8, FBXW12, PLXNB1, CCDC51, TMA7, ATRIP, TREX1, SHISA5, | 110                | ALS2CL (612402), TMIE (607237), PRSS50 (607950), MYL3 (160790), PTH1R (168468), NBEAL2 (614169), SETD2 (612778), KIF9 (607910), PTPN23 (606584), SCAP (601510), ELP6 (615020), CSPG5 (606775), SMARCC1 (601732), MAP4 (157132), CDC25A (116947), CAMP (600474), NME6 (608294), FBXW12 (609075), | Cytoregions Not Set |      |                |            |                             | false                   | arr[hg19]3p21.31p21.1(46,666,952-53,004,604) hmz |

| File | CN State | Type | Chromosome | Cytoband Start | Size (kb) | Marker Count | Gene Count | Genes                                                                                                                                                                                                                                                                                                                                 | OMIM ® Genes Count | OMIM ® Genes                                                                                                                                                                                                                                                                                                                                                                                                      | CytoRegions | Call | Interpretation | Curator By | Materially Modified Segment | Microarray Nomenclature |
|------|----------|------|------------|----------------|-----------|--------------|------------|---------------------------------------------------------------------------------------------------------------------------------------------------------------------------------------------------------------------------------------------------------------------------------------------------------------------------------------|--------------------|-------------------------------------------------------------------------------------------------------------------------------------------------------------------------------------------------------------------------------------------------------------------------------------------------------------------------------------------------------------------------------------------------------------------|-------------|------|----------------|------------|-----------------------------|-------------------------|
|      |          |      |            |                |           |              |            | SHISA5,<br>PFKFB4,<br>UCN2,<br>COL7A1,<br>MIR711,<br>UQCRC1,<br>TMEM89,<br>SLC26A6,<br>CELSR3,<br>MIR4793,<br>NCKIPSD,<br>IP6K2,<br>PRKAR2A,<br>SLC25A20,<br>ARIH2OS,<br>ARIH2,<br>P4HTM,<br>WDR6,<br>DALRD3,<br>MIR425,<br>NDUFAF3,<br>MIR191,<br>IMPDH2,<br>QRICH1,<br>QARS,<br>USP19,<br>LAMB2,<br>LAMB2P1,<br>CCDC71,<br>KLHDC8B, |                    | ,<br>PLXNB1<br>(601053)<br>,<br>ATRIP<br>(606605)<br>,<br>TRESX1<br>(606609)<br>,<br>SHISA5<br>(607290)<br>,<br>PFKFB4<br>(605320)<br>,<br>UCN2<br>(605902)<br>,<br>COL7A1<br>(120120)<br>,<br>UQCRC1<br>(191328)<br>,<br>SLC26A6<br>(610068)<br>,<br>CELSR3<br>(604264)<br>,<br>NCKIPSD<br>(606671)<br>,<br>IP6K2<br>(606992)<br>,<br>PRKAR2A<br>(176910)<br>,<br>SLC25A20<br>(613698)<br>,<br>ARIH2<br>(605615) |             |      |                |            |                             |                         |

| File | CN State | Type | Chromosome | Cytoband Start | Size (kb) | Marker Count | Gene Count | Genes                                                                                                                                                                                                                                                                                                                                                                                                             | OMIM ® Genes Count | OMIM ® Genes                                                                                                                                                                                                                                                                                                                                                                                                                                                            | CytoRegions | Call | Interpretation | Curator By | Materially Modified Segment | Microarray Nomenclature |
|------|----------|------|------------|----------------|-----------|--------------|------------|-------------------------------------------------------------------------------------------------------------------------------------------------------------------------------------------------------------------------------------------------------------------------------------------------------------------------------------------------------------------------------------------------------------------|--------------------|-------------------------------------------------------------------------------------------------------------------------------------------------------------------------------------------------------------------------------------------------------------------------------------------------------------------------------------------------------------------------------------------------------------------------------------------------------------------------|-------------|------|----------------|------------|-----------------------------|-------------------------|
|      |          |      |            |                |           |              |            | B,<br>LOC646<br>498,<br>CCDC36<br>,<br>C3orf62,<br>MIR4271<br>, USP4,<br>GPX1,<br>RHOA,<br>TCTA,<br>AMT,<br>NICN1,<br>DAG1,<br>BSN-<br>AS2,<br>BSN,<br>APEH,<br>MST1,<br>RNF123,<br>AMIGO3<br>,<br>GMPPB,<br>IP6K1,<br>CDHR4,<br>FAM212<br>A, UBA7,<br>MIR5193<br>, TRAI<br>P,<br>CAMKV,<br>MST1R,<br>MON1A,<br>RBM6,<br>RBM5,<br>RBM5-<br>AS1,<br>SEMA3F<br>,<br>GNAT1,<br>SLC38A<br>3,<br>GNAI2,<br>SEMA3B<br>, |                    | (605615)<br>, P4HTM<br>(614584)<br>, WDR6<br>(606031)<br>,<br>NDUFAF<br>3<br>(612911)<br>, MIR191<br>(615150)<br>,<br>IMPDH2<br>(146691)<br>, QARS<br>(603727)<br>, USP19<br>(614471)<br>, LAMB2<br>(150325)<br>,<br>KLHDC8<br>B<br>(613169)<br>, USP4<br>(603486)<br>, GPX1<br>(138320)<br>, RHOA<br>(165390)<br>, TCTA<br>(600690)<br>, AMT<br>(238310)<br>, NICN1<br>(611516)<br>, DAG1<br>(128239)<br>, BSN<br>(604020)<br>, APEH<br>(102645)<br>, MST1<br>(142408) |             |      |                |            |                             |                         |

| File | CN State | Type | Chromosome | Cytoband Start | Size (kb) | Marker Count | Gene Count | Genes                                                                                                                                                                                                                                                                                                                                                                                    | OMIM ® Genes Count | OMIM ® Genes                                                                                                                                                                                                                                                                                                                                                                                                                                                                                                                              | CytoRegions | Call | Interpretation | Curator By | Materially Modified Segment | Microarray Nomenclature |
|------|----------|------|------------|----------------|-----------|--------------|------------|------------------------------------------------------------------------------------------------------------------------------------------------------------------------------------------------------------------------------------------------------------------------------------------------------------------------------------------------------------------------------------------|--------------------|-------------------------------------------------------------------------------------------------------------------------------------------------------------------------------------------------------------------------------------------------------------------------------------------------------------------------------------------------------------------------------------------------------------------------------------------------------------------------------------------------------------------------------------------|-------------|------|----------------|------------|-----------------------------|-------------------------|
|      |          |      |            |                |           |              |            | ,<br>LSMEM2,<br>, IFRD2,<br>HYAL3,<br>NAT6,<br>HYAL1,<br>HYAL2,<br>TUSC2,<br>RASSF1,<br>,<br>ZMYND10,<br>NPRL2,<br>CYB561D2,<br>TMEM115,<br>CACNA2D2,<br>C3orf18,<br>HEMK1,<br>CISH,<br>MAPKAPK3,<br>MIR4787,<br>,<br>DOCK3,<br>MANF,<br>RBM15B,<br>,<br>VPRBP,<br>RAD54L2,<br>TEX264,<br>GRM2,<br>IQCF6,<br>IQCF4,<br>IQCF3,<br>IQCF2,<br>IQCF5,<br>IQCF1,<br>RRP9,<br>PARP3,<br>GPR62, |                    | (142408),<br>,<br>RNF123<br>(614472),<br>,<br>IP6K1<br>(606991),<br>,<br>UBA7<br>(191325),<br>,<br>TRAI<br>(605958),<br>,<br>CAMKV<br>(614993),<br>,<br>MST1R<br>(600168),<br>,<br>MON1A<br>(611464),<br>,<br>RBM6<br>(606886),<br>,<br>RBM5<br>(606884),<br>,<br>SEMA3F<br>(601124),<br>,<br>GNAT1<br>(139330),<br>,<br>SLC38A3<br>(604437),<br>,<br>GNAI2<br>(139360),<br>,<br>SEMA3B<br>(601281),<br>,<br>IFRD2<br>(602725),<br>,<br>HYAL3<br>(604038),<br>,<br>NAT6<br>(607073),<br>,<br>HYAL1<br>(607071),<br>,<br>HYAL2<br>(603551) |             |      |                |            |                             |                         |

| File | CN State | Type | Chromosome | Cytoband Start | Size (kbp) | Marker Count | Gene Count | Genes                                                                                                                                                                                                                                                                                                                                                                                                         | OMIM ® Genes Count | OMIM ® Genes                                                                                                                                                                                                                                                                                                                                                                                                                      | CytoRegions | Call | Interpretation | Curator By | Materially Modified Segment | Microarray Nomenclature |
|------|----------|------|------------|----------------|------------|--------------|------------|---------------------------------------------------------------------------------------------------------------------------------------------------------------------------------------------------------------------------------------------------------------------------------------------------------------------------------------------------------------------------------------------------------------|--------------------|-----------------------------------------------------------------------------------------------------------------------------------------------------------------------------------------------------------------------------------------------------------------------------------------------------------------------------------------------------------------------------------------------------------------------------------|-------------|------|----------------|------------|-----------------------------|-------------------------|
|      |          |      |            |                |            |              |            | GPR62,<br>PCBP4,<br>ABHD14<br>B,<br>ABHD14<br>A,<br>ABHD14<br>A-ACY1,<br>ACY1,<br>RPL29,<br>DUSP7,<br>LINC006<br>96,<br>POC1A,<br>ALAS1,<br>TLR9,<br>TWF2,<br>PPM1M,<br>WDR82,<br>MIRLET<br>7G,<br>GLYCTK<br>,<br>MIR135<br>A1,<br>DNAH1,<br>BAP1,<br>PHF7,<br>SEMA3<br>G,<br>TNNC1,<br>NISCH,<br>STAB1,<br>NT5DC2<br>, SMIM4,<br>PBRM1,<br>GNL3,<br>SNORD<br>19,<br>SNORD<br>19B,<br>SNORD<br>69,<br>GLT8D1, |                    | (603551)<br>, TUSC2<br>(607052)<br>,<br>RASSF1<br>(605082)<br>,<br>ZMYND1<br>0<br>(607070)<br>, NPRL2<br>(607072)<br>,<br>CYB561<br>D2<br>(607068)<br>,<br>TMEM11<br>5<br>(607069)<br>,<br>CACNA2<br>D2<br>(607082)<br>, CISH<br>(602441)<br>,<br>MAPKA<br>PK3<br>(602130)<br>, DOCK3<br>(603123)<br>, MANF<br>(601916)<br>,<br>RBM15B<br>(612602)<br>, GRM2<br>(604099)<br>, PARP3<br>(607726)<br>, GPR62<br>(606917)<br>, PCBP4 |             |      |                |            |                             |                         |



| File | CN State | Type | Chromosome | Cytoband Start | Size (kbp) | Marker Count | Gene Count | Genes                                                                                                                    | OMIM ® Genes Count | OMIM ® Genes                                                                                                                                                                                                                                                                                                                                                                                                                | CytoRegions | Call | Interpretation | Curator By | Materially Modified Segment | Microarray Nomenclature |
|------|----------|------|------------|----------------|------------|--------------|------------|--------------------------------------------------------------------------------------------------------------------------|--------------------|-----------------------------------------------------------------------------------------------------------------------------------------------------------------------------------------------------------------------------------------------------------------------------------------------------------------------------------------------------------------------------------------------------------------------------|-------------|------|----------------|------------|-----------------------------|-------------------------|
|      |          |      |            |                |            |              |            | GLT8D1,<br>SPCS1,<br>NEK4,<br>ITIH1,<br>ITIH3,<br>ITIH4,<br>MUSTN1<br>,<br>TMEM110-<br>MUSTN1<br>,<br>TMEM110,<br>SFMBT1 |                    | , PCBP4 (608503)<br>, ACY1 (104620)<br>, RPL29 (601832)<br>, DUSP7 (602749)<br>, POC1A (614783)<br>, ALAS1 (125290)<br>, TLR9 (605474)<br>, TWF2 (607433)<br>, PPM1M (608979)<br>, WDR82 (611059)<br>,<br>MIRLET7G (612102)<br>,<br>GLYCTK (610516)<br>, DNAH1 (603332)<br>, BAP1 (603089)<br>, TNNC1 (191040)<br>, STAB1 (608560)<br>, PBRM1 (606083)<br>, GNL3 (608011)<br>, SPCS1 (610358)<br>, NEK4 (601959)<br>, ITIH1 |             |      |                |            |                             |                         |

| File | CN State | Type | Chromosome | Cytoband Start | Size (kbp) | Marker Count | Gene Count | Genes | OMIM ® Genes Count | OMIM ® Genes                                                                  | CytoRegions | Call | Interpretation | Curator By | Materially Modified Segment | Microarray Nomenclature |
|------|----------|------|------------|----------------|------------|--------------|------------|-------|--------------------|-------------------------------------------------------------------------------|-------------|------|----------------|------------|-----------------------------|-------------------------|
|      |          |      |            |                |            |              |            |       |                    | , ITIH1 (147270)<br>, ITIH3 (146650)<br>, ITIH4 (600564)<br>, SFMBT1 (607319) |             |      |                |            |                             |                         |

| File                                  | CN State | Type | Chromosome | Cytoband Start | Size (kbp) | Marker Count | Gene Count | Genes                                                                                                                                                                                                                                                                                     | OMIM ® Genes Count | OMIM ® Genes                                                                                                                                                                                                                                                                                    | CytoRegions         | Call | Interpretation | Curator By | Materially Modified Segment | Microarray Nomenclature                          |
|---------------------------------------|----------|------|------------|----------------|------------|--------------|------------|-------------------------------------------------------------------------------------------------------------------------------------------------------------------------------------------------------------------------------------------------------------------------------------------|--------------------|-------------------------------------------------------------------------------------------------------------------------------------------------------------------------------------------------------------------------------------------------------------------------------------------------|---------------------|------|----------------|------------|-----------------------------|--------------------------------------------------|
| P18_(Cytoscan750K_Array).cy750K.cychp |          | LOH  | 3          | p21.31         | 5,613      | 160          | 148        | ALS2CL, TMIE, PRSS50, PRSS46, PRSS45, PRSS42, MYL3, PTH1R, CCDC12, NBEAL2, NRADD, SETD2, KIF9-AS1, KIF9, KLHL18, PTPN23, SCAP, ELP6, CSPG5, SMARCC1, DHX30, MIR1226, MAP4, CDC25A, MIR4443, CAMP, ZNF589, NME6, SPINK8, FBXW12, PLXNB1, CCDC51, TMA7, ATRIP, TREX1, SHISA5, PFKFB4, UCN2, | 96                 | ALS2CL (612402), TMIE (607237), PRSS50 (607950), MYL3 (160790), PTH1R (168468), NBEAL2 (614169), SETD2 (612778), KIF9 (607910), PTPN23 (606584), SCAP (601510), ELP6 (615020), CSPG5 (606775), SMARCC1 (601732), MAP4 (157132), CDC25A (116947), CAMP (600474), NME6 (608294), FBXW12 (609075), | Cytoregions Not Set |      |                |            | false                       | arr[hg19]3p21.31p21.2(46,678,294-52,291,735) hmz |

| File | CN State | Type | Chromosome | Cytoband Start | Size (kbp) | Marker Count | Gene Count | Genes                                                                                                                                                                                                                                                                                                                         | OMIM ® Genes Count | OMIM ® Genes                                                                                                                                                                                                                                                                                                                                                                                                      | CytoRegions | Call | Interpretation | Curator By | Materially Modified Segment | Microarray Nomenclature |  |
|------|----------|------|------------|----------------|------------|--------------|------------|-------------------------------------------------------------------------------------------------------------------------------------------------------------------------------------------------------------------------------------------------------------------------------------------------------------------------------|--------------------|-------------------------------------------------------------------------------------------------------------------------------------------------------------------------------------------------------------------------------------------------------------------------------------------------------------------------------------------------------------------------------------------------------------------|-------------|------|----------------|------------|-----------------------------|-------------------------|--|
|      |          |      |            |                |            |              |            | UCN2,<br>COL7A1,<br>MIR711,<br>UQCRC1,<br>TMEM89,<br>SLC26A6,<br>CELSR3,<br>MIR4793,<br>NCKIPSD,<br>IP6K2,<br>PRKAR2A,<br>SLC25A20,<br>ARIH20S,<br>ARIH2,<br>P4HTM,<br>WDR6,<br>DALRD3,<br>MIR425,<br>NDUFAF3,<br>MIR191,<br>IMPDH2,<br>QRICH1,<br>QARS,<br>USP19,<br>LAMB2,<br>LAMB2P1,<br>CCDC71,<br>KLHDC8B,<br>LOC646498, |                    | ,<br>PLXNB1<br>(601053)<br>,<br>ATRIP<br>(606605)<br>,<br>TRESX1<br>(606609)<br>,<br>SHISA5<br>(607290)<br>,<br>PFKFB4<br>(605320)<br>,<br>UCN2<br>(605902)<br>,<br>COL7A1<br>(120120)<br>,<br>UQCRC1<br>(191328)<br>,<br>SLC26A6<br>(610068)<br>,<br>CELSR3<br>(604264)<br>,<br>NCKIPSD<br>(606671)<br>,<br>IP6K2<br>(606992)<br>,<br>PRKAR2A<br>(176910)<br>,<br>SLC25A20<br>(613698)<br>,<br>ARIH2<br>(605615) |             |      |                |            |                             |                         |  |

| File | CN State | Type | Chromosome | Cytoband Start | Size (kb) | Marker Count | Gene Count | Genes                                                                                                                                                                                                                                                                   | OMIM ® Genes Count | OMIM ® Genes                                                                                                                                                                                                                                                                                                      | CytoRegions | Call | Interpretation | Curator By | Materially Modified Segment | Microarray Nomenclature |  |
|------|----------|------|------------|----------------|-----------|--------------|------------|-------------------------------------------------------------------------------------------------------------------------------------------------------------------------------------------------------------------------------------------------------------------------|--------------------|-------------------------------------------------------------------------------------------------------------------------------------------------------------------------------------------------------------------------------------------------------------------------------------------------------------------|-------------|------|----------------|------------|-----------------------------|-------------------------|--|
|      |          |      |            |                |           |              |            | 498, CCDC36, C3orf62, MIR4271, USP4, GPX1, RHOA, TCTA, AMT, NICN1, DAG1, BSN-AS2, BSN, APEH, MST1, RNF123, AMIGO3, GMPPB, IP6K1, CDHR4, FAM212A, UBA7, MIR5193, TRAIP, CAMKV, MST1R, MON1A, RBM6, RBM5, RBM5-AS1, SEMA3F, GNAT1, SLC38A3, GNAI2, SEMA3B, LSMEM2, IFRD2, |                    | (605615), P4HTM (614584), WDR6 (606031), NDUFAF3 (612911), MIR191 (615150), IMPDH2 (146691), QARS (603727), USP19 (614471), LAMB2 (150325), KLHDC8B (613169), USP4 (603486), GPX1 (138320), RHOA (165390), TCTA (600690), AMT (238310), NICN1 (611516), DAG1 (128239), BSN (604020), APEH (102645), MST1 (142408) |             |      |                |            |                             |                         |  |

| File | CN State | Type | Chromosome | Cytoband Start | Size (kbp) | Marker Count | Gene Count | Genes                                                                                                                                                                                                                                                                                                                                                                                                             | OMIM ® Genes Count | OMIM ® Genes                                                                                                                                                                                                                                                                                                                                                                                                                                                                                                                | CytoRegions | Call | Interpretation | Curator By | Materially Modified Segment | Microarray Nomenclature |
|------|----------|------|------------|----------------|------------|--------------|------------|-------------------------------------------------------------------------------------------------------------------------------------------------------------------------------------------------------------------------------------------------------------------------------------------------------------------------------------------------------------------------------------------------------------------|--------------------|-----------------------------------------------------------------------------------------------------------------------------------------------------------------------------------------------------------------------------------------------------------------------------------------------------------------------------------------------------------------------------------------------------------------------------------------------------------------------------------------------------------------------------|-------------|------|----------------|------------|-----------------------------|-------------------------|
|      |          |      |            |                |            |              |            | , IFRD2,<br>HYAL3,<br>NAT6,<br>HYAL1,<br>HYAL2,<br>TUSC2,<br>RASSF1<br>,<br>ZMYND1<br>0,<br>NPRL2,<br>CYB561<br>D2,<br>TMEM11<br>5,<br>CACNA2<br>D2,<br>C3orf18,<br>HEMK1,<br>CISH,<br>MAPKA<br>PK3,<br>MIR4787<br>,<br>DOCK3,<br>MANF,<br>RBM15B<br>,<br>VPRBP,<br>RAD54L<br>2,<br>TEX264,<br>GRM2,<br>IQCF6,<br>IQCF4,<br>IQCF3,<br>IQCF2,<br>IQCF5,<br>IQCF1,<br>RRP9,<br>PARP3,<br>GPR62,<br>PCBP4,<br>ABHD14 |                    | (142408)<br>,<br>RNF123<br>(614472)<br>,<br>IP6K1<br>(606991)<br>,<br>UBA7<br>(191325)<br>,<br>TRAIP<br>(605958)<br>,<br>CAMKV<br>(614993)<br>,<br>MST1R<br>(600168)<br>,<br>MON1A<br>(611464)<br>,<br>RBM6<br>(606886)<br>,<br>RBM5<br>(606884)<br>,<br>SEMA3F<br>(601124)<br>,<br>GNAT1<br>(139330)<br>,<br>SLC38A<br>3<br>(604437)<br>,<br>GNAI2<br>(139360)<br>,<br>SEMA3B<br>(601281)<br>,<br>IFRD2<br>(602725)<br>,<br>HYAL3<br>(604038)<br>,<br>NAT6<br>(607073)<br>,<br>HYAL1<br>(607071)<br>,<br>HYAL2<br>(603551) |             |      |                |            |                             |                         |

| File | CN State | Type | Chromosome | Cytoband Start | Size (kb) | Marker Count | Gene Count | Genes                                                                                                                                        | OMIM ® Genes Count | OMIM ® Genes                                                                                                                                                                                                                                                                | CytoRegions | Call | Interpretation | Curator By | Materially Modified Segment | Microarray Nomenclature |  |
|------|----------|------|------------|----------------|-----------|--------------|------------|----------------------------------------------------------------------------------------------------------------------------------------------|--------------------|-----------------------------------------------------------------------------------------------------------------------------------------------------------------------------------------------------------------------------------------------------------------------------|-------------|------|----------------|------------|-----------------------------|-------------------------|--|
|      |          |      |            |                |           |              |            | ABHD14 B,<br>ABHD14 A,<br>ABHD14 A-ACY1,<br>ACY1,<br>RPL29,<br>DUSP7,<br>LINC00696,<br>POC1A,<br>ALAS1,<br>TLR9,<br>TWF2,<br>PPM1M,<br>WDR82 |                    | (603551), TUSC2 (607052), RASSF1 (605082), ZMYND10 (607070), NPRL2 (607072), CYB561D2 (607068), TMEM115 (607069), CACNA2D2 (607082), CISH (602441), MAPKAPK3 (602130), DOCK3 (603123), MANF (601916), RBM15B (612602), GRM2 (604099), PARP3 (607726), GPR62 (606917), PCBP4 |             |      |                |            |                             |                         |  |

| File | CN State | Type | Chromosome | Cytoband Start | Size (kb) | Marker Count | Gene Count | Genes | OMIM ® Genes Count | OMIM ® Genes                                                                                                                                                                            | CytoRegions | Call | Interpretation | Curator By | Materially Modified Segment | Microarray Nomenclature |  |
|------|----------|------|------------|----------------|-----------|--------------|------------|-------|--------------------|-----------------------------------------------------------------------------------------------------------------------------------------------------------------------------------------|-------------|------|----------------|------------|-----------------------------|-------------------------|--|
|      |          |      |            |                |           |              |            |       |                    | ,PCBP4 (608503)<br>,ACY1 (104620)<br>,RPL29 (601832)<br>,DUSP7 (602749)<br>,POC1A (614783)<br>,ALAS1 (125290)<br>,TLR9 (605474)<br>,TWF2 (607433)<br>,PPM1M (608979)<br>,WDR82 (611059) |             |      |                |            |                             |                         |  |



| File                                  | CN State | Type | Chromosome | Cytoband Start | Size (kbp) | Marker Count | Gene Count | Genes                                                                                                                                                                                                                                                                                     | OMIM ® Genes Count | OMIM ® Genes                                                                                                                                                                                                                                                                                    | CytoRegions         | Call | Interpretation | Curator By | Materially Modified Segment | Microarray Nomenclature                          |
|---------------------------------------|----------|------|------------|----------------|------------|--------------|------------|-------------------------------------------------------------------------------------------------------------------------------------------------------------------------------------------------------------------------------------------------------------------------------------------|--------------------|-------------------------------------------------------------------------------------------------------------------------------------------------------------------------------------------------------------------------------------------------------------------------------------------------|---------------------|------|----------------|------------|-----------------------------|--------------------------------------------------|
| P10_(Cytoscan750K_Array).cy750K.cychp |          | LOH  | 3          | p21.31         | 6,142      | 182          | 169        | ALS2CL, TMIE, PRSS50, PRSS46, PRSS45, PRSS42, MYL3, PTH1R, CCDC12, NBEAL2, NRADD, SETD2, KIF9-AS1, KIF9, KLHL18, PTPN23, SCAP, ELP6, CSPG5, SMARCC1, DHX30, MIR1226, MAP4, CDC25A, MIR4443, CAMP, ZNF589, NME6, SPINK8, FBXW12, PLXNB1, CCDC51, TMA7, ATRIP, TREX1, SHISA5, PFKFB4, UCN2, | 107                | ALS2CL (612402), TMIE (607237), PRSS50 (607950), MYL3 (160790), PTH1R (168468), NBEAL2 (614169), SETD2 (612778), KIF9 (607910), PTPN23 (606584), SCAP (601510), ELP6 (615020), CSPG5 (606775), SMARCC1 (601732), MAP4 (157132), CDC25A (116947), CAMP (600474), NME6 (608294), FBXW12 (609075), | Cytoregions Not Set |      |                |            | false                       | arr[hg19]3p21.31p21.1(46,678,984-52,821,011) hmz |

| File | CN State | Type | Chromosome | Cytoband Start | Size (kbp) | Marker Count | Gene Count | Genes                                                                                                                                                                                                                                                                                                                         | OMIM ® Genes Count | OMIM ® Genes                                                                                                                                                                                                                                                                                                                                              | CytoRegions | Call | Interpretation | Curator By | Materially Modified Segment | Microarray Nomenclature |  |
|------|----------|------|------------|----------------|------------|--------------|------------|-------------------------------------------------------------------------------------------------------------------------------------------------------------------------------------------------------------------------------------------------------------------------------------------------------------------------------|--------------------|-----------------------------------------------------------------------------------------------------------------------------------------------------------------------------------------------------------------------------------------------------------------------------------------------------------------------------------------------------------|-------------|------|----------------|------------|-----------------------------|-------------------------|--|
|      |          |      |            |                |            |              |            | UCN2,<br>COL7A1,<br>MIR711,<br>UQCRC1,<br>TMEM89,<br>SLC26A6,<br>CELSR3,<br>MIR4793,<br>NCKIPSD,<br>IP6K2,<br>PRKAR2A,<br>SLC25A20,<br>ARIH20S,<br>ARIH2,<br>P4HTM,<br>WDR6,<br>DALRD3,<br>MIR425,<br>NDUFAF3,<br>MIR191,<br>IMPDH2,<br>QRICH1,<br>QARS,<br>USP19,<br>LAMB2,<br>LAMB2P1,<br>CCDC71,<br>KLHDC8B,<br>LOC646498, |                    | ,<br>PLXNB1<br>(601053),<br>ATRIP<br>(606605),<br>TRESX1<br>(606609),<br>SHISA5<br>(607290),<br>PFKFB4<br>(605320),<br>UCN2<br>(605902),<br>COL7A1<br>(120120),<br>UQCRC1<br>(191328),<br>SLC26A6<br>(610068),<br>CELSR3<br>(604264),<br>NCKIPSD<br>(606671),<br>IP6K2<br>(606992),<br>PRKAR2A<br>(176910),<br>SLC25A20<br>(613698),<br>ARIH2<br>(605615) |             |      |                |            |                             |                         |  |

| File | CN State | Type | Chromosome | Cytoband Start | Size (kb) | Marker Count | Gene Count | Genes                                                                                                                                                                                                                                                                   | OMIM ® Genes Count | OMIM ® Genes                                                                                                                                                                                                                                                                                                      | CytoRegions | Call | Interpretation | Curator By | Materially Modified Segment | Microarray Nomenclature |  |
|------|----------|------|------------|----------------|-----------|--------------|------------|-------------------------------------------------------------------------------------------------------------------------------------------------------------------------------------------------------------------------------------------------------------------------|--------------------|-------------------------------------------------------------------------------------------------------------------------------------------------------------------------------------------------------------------------------------------------------------------------------------------------------------------|-------------|------|----------------|------------|-----------------------------|-------------------------|--|
|      |          |      |            |                |           |              |            | 498, CCDC36, C3orf62, MIR4271, USP4, GPX1, RHOA, TCTA, AMT, NICN1, DAG1, BSN-AS2, BSN, APEH, MST1, RNF123, AMIGO3, GMPPB, IP6K1, CDHR4, FAM212A, UBA7, MIR5193, TRAIP, CAMKV, MST1R, MON1A, RBM6, RBM5, RBM5-AS1, SEMA3F, GNAT1, SLC38A3, GNAI2, SEMA3B, LSMEM2, IFRD2, |                    | (605615), P4HTM (614584), WDR6 (606031), NDUFAF3 (612911), MIR191 (615150), IMPDH2 (146691), QARS (603727), USP19 (614471), LAMB2 (150325), KLHDC8B (613169), USP4 (603486), GPX1 (138320), RHOA (165390), TCTA (600690), AMT (238310), NICN1 (611516), DAG1 (128239), BSN (604020), APEH (102645), MST1 (142408) |             |      |                |            |                             |                         |  |

| File | CN State | Type | Chromosome | Cytoband Start | Size (kbp) | Marker Count | Gene Count | Genes                                                                                                                                                                                                                                                                                                                                                                                                             | OMIM ® Genes Count | OMIM ® Genes                                                                                                                                                                                                                                                                                                                                                                                                                                                                                                                | CytoRegions | Call | Interpretation | Curator By | Materially Modified Segment | Microarray Nomenclature |
|------|----------|------|------------|----------------|------------|--------------|------------|-------------------------------------------------------------------------------------------------------------------------------------------------------------------------------------------------------------------------------------------------------------------------------------------------------------------------------------------------------------------------------------------------------------------|--------------------|-----------------------------------------------------------------------------------------------------------------------------------------------------------------------------------------------------------------------------------------------------------------------------------------------------------------------------------------------------------------------------------------------------------------------------------------------------------------------------------------------------------------------------|-------------|------|----------------|------------|-----------------------------|-------------------------|
|      |          |      |            |                |            |              |            | , IFRD2,<br>HYAL3,<br>NAT6,<br>HYAL1,<br>HYAL2,<br>TUSC2,<br>RASSF1<br>,<br>ZMYND1<br>0,<br>NPRL2,<br>CYB561<br>D2,<br>TMEM11<br>5,<br>CACNA2<br>D2,<br>C3orf18,<br>HEMK1,<br>CISH,<br>MAPKA<br>PK3,<br>MIR4787<br>,<br>DOCK3,<br>MANF,<br>RBM15B<br>,<br>VPRBP,<br>RAD54L<br>2,<br>TEX264,<br>GRM2,<br>IQCF6,<br>IQCF4,<br>IQCF3,<br>IQCF2,<br>IQCF5,<br>IQCF1,<br>RRP9,<br>PARP3,<br>GPR62,<br>PCBP4,<br>ABHD14 |                    | (142408)<br>,<br>RNF123<br>(614472)<br>,<br>IP6K1<br>(606991)<br>,<br>UBA7<br>(191325)<br>,<br>TRAIP<br>(605958)<br>,<br>CAMKV<br>(614993)<br>,<br>MST1R<br>(600168)<br>,<br>MON1A<br>(611464)<br>,<br>RBM6<br>(606886)<br>,<br>RBM5<br>(606884)<br>,<br>SEMA3F<br>(601124)<br>,<br>GNAT1<br>(139330)<br>,<br>SLC38A<br>3<br>(604437)<br>,<br>GNAI2<br>(139360)<br>,<br>SEMA3B<br>(601281)<br>,<br>IFRD2<br>(602725)<br>,<br>HYAL3<br>(604038)<br>,<br>NAT6<br>(607073)<br>,<br>HYAL1<br>(607071)<br>,<br>HYAL2<br>(603551) |             |      |                |            |                             |                         |

| File | CN State | Type | Chromosome | Cytoband Start | Size (kbp) | Marker Count | Gene Count | Genes                                                                                                                                                                                                                                                                                                                                                           | OMIM ® Genes Count | OMIM ® Genes                                                                                                                                                                                                                                                                                                                | CytoRegions | Call | Interpretation | Curator By | Materially Modified Segment | Microarray Nomenclature |
|------|----------|------|------------|----------------|------------|--------------|------------|-----------------------------------------------------------------------------------------------------------------------------------------------------------------------------------------------------------------------------------------------------------------------------------------------------------------------------------------------------------------|--------------------|-----------------------------------------------------------------------------------------------------------------------------------------------------------------------------------------------------------------------------------------------------------------------------------------------------------------------------|-------------|------|----------------|------------|-----------------------------|-------------------------|
|      |          |      |            |                |            |              |            | ABHD14B,<br>ABHD14A,<br>ABHD14A-ACY1,<br>ACY1,<br>RPL29,<br>DUSP7,<br>LINC00696,<br>POC1A,<br>ALAS1,<br>TLR9,<br>TWF2,<br>PPM1M,<br>WDR82,<br>MIRLET7G,<br>GLYCTK,<br>MIR135A1,<br>DNAH1,<br>BAP1,<br>PHF7,<br>SEMA3G,<br>TNNC1,<br>NISCH,<br>STAB1,<br>NT5DC2,<br>SMIM4,<br>PBRM1,<br>GNL3,<br>SNORD19,<br>SNORD19B,<br>SNORD69,<br>GLT8D1,<br>SPCS1,<br>NEK4, |                    | (603551),<br>TUSC2 (607052),<br>RASSF1 (605082),<br>ZMYND10 (607070),<br>NPRL2 (607072),<br>CYB561D2 (607068),<br>TMEM115 (607069),<br>CACNA2D2 (607082),<br>CISH (602441),<br>MAPKAPK3 (602130),<br>DOCK3 (603123),<br>MANF (601916),<br>RBM15B (612602),<br>GRM2 (604099),<br>PARP3 (607726),<br>GPR62 (606917),<br>PCBP4 |             |      |                |            |                             |                         |

| File | CN State | Type | Chromosome | Cytoband Start | Size (kbp) | Marker Count | Gene Count | Genes          | OMIM ® Genes Count | OMIM ® Genes                                                                                                                                                                                                                                                                                                                                                                                                          | CytoRegions | Call | Interpretation | Curator By | Materially Modified Segment | Microarray Nomenclature |
|------|----------|------|------------|----------------|------------|--------------|------------|----------------|--------------------|-----------------------------------------------------------------------------------------------------------------------------------------------------------------------------------------------------------------------------------------------------------------------------------------------------------------------------------------------------------------------------------------------------------------------|-------------|------|----------------|------------|-----------------------------|-------------------------|
|      |          |      |            |                |            |              |            | NEK4,<br>ITIH1 |                    | , PCBP4 (608503)<br>, ACY1 (104620)<br>, RPL29 (601832)<br>, DUSP7 (602749)<br>, POC1A (614783)<br>, ALAS1 (125290)<br>, TLR9 (605474)<br>, TWFG (607433)<br>, PPM1M (608979)<br>, WDR82 (611059)<br>, MIRLET7G (612102)<br>, GLYCTK (610516)<br>, DNAH1 (603332)<br>, BAP1 (603089)<br>, TNNC1 (191040)<br>, STAB1 (608560)<br>, PBRM1 (606083)<br>, GNL3 (608011)<br>, SPCS1 (610358)<br>, NEK4 (601959)<br>, ITIH1 |             |      |                |            |                             |                         |

| File | CN State | Type | Chromosome | Cytoband Start | Size (kb) | Marker Count | Gene Count | Genes | OMIM® Genes Count | OMIM® Genes      | CytoRegions | Call | Interpretation | Curation By | Materially Modified Segment | Microarray Nomenclature |
|------|----------|------|------------|----------------|-----------|--------------|------------|-------|-------------------|------------------|-------------|------|----------------|-------------|-----------------------------|-------------------------|
|      |          |      |            |                |           |              |            |       |                   | , ITIH1 (147270) |             |      |                |             |                             |                         |

| File                                    | CN State | Type | Chromosome | Cytoband Start | Size (kbp) | Marker Count | Gene Count | Genes                                                                                                                                                                                                                                                                                     | OMIM ® Genes Count | OMIM ® Genes                                                                                                                                                                                                                                                                                   | CytoRegions         | Call | Interpretation | Curator By | Materially Modified Segment | Microarray Nomenclature |                                                  |
|-----------------------------------------|----------|------|------------|----------------|------------|--------------|------------|-------------------------------------------------------------------------------------------------------------------------------------------------------------------------------------------------------------------------------------------------------------------------------------------|--------------------|------------------------------------------------------------------------------------------------------------------------------------------------------------------------------------------------------------------------------------------------------------------------------------------------|---------------------|------|----------------|------------|-----------------------------|-------------------------|--------------------------------------------------|
| P14_(CytoScan750K_Array).cyc750K.cyc.hp |          | LOH  | 3          | p21.31         | 6,182      | 179          | 173        | TMIE, PRSS50, PRSS46, PRSS45, PRSS42, MYL3, PTH1R, CCDC12, NBEAL2, NRADD, SETD2, KIF9-AS1, KIF9, KLHL18, PTPN23, SCAP, ELP6, CSPG5, SMARCC1, DHX30, MIR1226, MAP4, CDC25A, MIR4443, CAMP, ZNF589, NME6, SPINK8, FBXW12, PLXNB1, CCDC51, TMA7, ATRIP, TREX1, SHISA5, PFKFB4, UCN2, COL7A1, | 108                | TMIE (607237), PRSS50 (607950), MYL3 (160790), PTH1R (168468), NBEAL2 (614169), SETD2 (612778), KIF9 (607910), PTPN23 (606584), SCAP (601510), ELP6 (615020), CSPG5 (606775), SMARCC1 (601732), MAP4 (157132), CDC25A (116947), CAMP (600474), NME6 (608294), FBXW12 (609075), PLXNB1 (601053) | Cytoregions Not Set |      |                |            |                             | false                   | arr[hg19]3p21.31p21.1(46,745,395-52,927,228) hmz |



| File | CN State | Type | Chromosome | Cytoband Start | Size (kb) | Marker Count | Gene Count | Genes                                                                                                                                                                                                                                                                                                                          | OMIM ® Genes Count | OMIM ® Genes                                                                                                                                                                                                                                                                                                                                                    | CytoRegions | Call | Interpretation | Curator By | Materially Modified Segment | Microarray Nomenclature |
|------|----------|------|------------|----------------|-----------|--------------|------------|--------------------------------------------------------------------------------------------------------------------------------------------------------------------------------------------------------------------------------------------------------------------------------------------------------------------------------|--------------------|-----------------------------------------------------------------------------------------------------------------------------------------------------------------------------------------------------------------------------------------------------------------------------------------------------------------------------------------------------------------|-------------|------|----------------|------------|-----------------------------|-------------------------|
|      |          |      |            |                |           |              |            | COL7A1,<br>MIR711,<br>UQCRC1,<br>TMEM89,<br>SLC26A6,<br>CELSR3,<br>MIR4793,<br>NCKIPSD,<br>IP6K2,<br>PRKAR2A,<br>SLC25A20,<br>ARIH2OS,<br>ARIH2,<br>P4HTM,<br>WDR6,<br>DALRD3,<br>MIR425,<br>NDUFAF3,<br>MIR191,<br>IMPDH2,<br>QRICH1,<br>QARS,<br>USP19,<br>LAMB2,<br>LAMB2P1,<br>CCDC71,<br>KLHDC8B,<br>LOC646498,<br>CCDC36 |                    | (601053),<br>ATRIP<br>(606605),<br>TRES1<br>(606609),<br>SHISA5<br>(607290),<br>PFKFB4<br>(605320),<br>UCN2<br>(605902),<br>COL7A1<br>(120120),<br>UQCRC1<br>(191328),<br>SLC26A6<br>(610068),<br>CELSR3<br>(604264),<br>NCKIPSD<br>(606671),<br>IP6K2<br>(606992),<br>PRKAR2A<br>(176910),<br>SLC25A20<br>(613698),<br>ARIH2<br>(605615),<br>P4HTM<br>(614584) |             |      |                |            |                             |                         |

| File | CN State | Type | Chromosome | Cytoband Start | Size (kb) | Marker Count | Gene Count | Genes                                                                                                                                                                                                                                                                                                                                                                                                                         | OMIM ® Genes Count | OMIM ® Genes                                                                                                                                                                                                                                                                                                                                                                                                                                                                                                 | CytoRegions | Call | Interpretation | Curator By | Materially Modified Segment | Microarray Nomenclature |
|------|----------|------|------------|----------------|-----------|--------------|------------|-------------------------------------------------------------------------------------------------------------------------------------------------------------------------------------------------------------------------------------------------------------------------------------------------------------------------------------------------------------------------------------------------------------------------------|--------------------|--------------------------------------------------------------------------------------------------------------------------------------------------------------------------------------------------------------------------------------------------------------------------------------------------------------------------------------------------------------------------------------------------------------------------------------------------------------------------------------------------------------|-------------|------|----------------|------------|-----------------------------|-------------------------|
|      |          |      |            |                |           |              |            | CCDC36<br>,<br>C3orf62,<br>MIR4271<br>,<br>USP4,<br>GPX1,<br>RHOA,<br>TCTA,<br>AMT,<br>NICN1,<br>DAG1,<br>BSN-<br>AS2,<br>BSN,<br>APEH,<br>MST1,<br>RNF123,<br>AMIGO3<br>,<br>GMPPB,<br>IP6K1,<br>CDHR4,<br>FAM212<br>A, UBA7,<br>MIR5193<br>,<br>TRAI,<br>CAMKV,<br>MST1R,<br>MON1A,<br>RBM6,<br>RBM5,<br>RBM5-<br>AS1,<br>SEMA3F<br>,<br>GNAT1,<br>SLC38A<br>3,<br>GNAI2,<br>SEMA3B<br>,<br>LSMEM2<br>,<br>IFRD2,<br>HYAL3, |                    | (614584)<br>,<br>WDR6<br>(606031)<br>,<br>NDUFAF<br>3<br>(612911)<br>,<br>MIR191<br>(615150)<br>,<br>IMPDH2<br>(146691)<br>,<br>QARS<br>(603727)<br>,<br>USP19<br>(614471)<br>,<br>LAMB2<br>(150325)<br>,<br>KLHDC8<br>B<br>(613169)<br>,<br>USP4<br>(603486)<br>,<br>GPX1<br>(138320)<br>,<br>RHOA<br>(165390)<br>,<br>TCTA<br>(600690)<br>,<br>AMT<br>(238310)<br>,<br>NICN1<br>(611516)<br>,<br>DAG1<br>(128239)<br>,<br>BSN<br>(604020)<br>,<br>APEH<br>(102645)<br>,<br>MST1<br>(142408)<br>,<br>RNF123 |             |      |                |            |                             |                         |

| File | CN State | Type | Chromosome | Cytoband Start | Size (kbp) | Marker Count | Gene Count | Genes                                                                                                                                                                                                                                                                                                                                                                           | OMIM ® Genes Count | OMIM ® Genes                                                                                                                                                                                                                                                                                                                                                                                                                                                                                                                         | CytoRegions | Call | Interpretation | Curator By | Materially Modified Segment | Microarray Nomenclature |
|------|----------|------|------------|----------------|------------|--------------|------------|---------------------------------------------------------------------------------------------------------------------------------------------------------------------------------------------------------------------------------------------------------------------------------------------------------------------------------------------------------------------------------|--------------------|--------------------------------------------------------------------------------------------------------------------------------------------------------------------------------------------------------------------------------------------------------------------------------------------------------------------------------------------------------------------------------------------------------------------------------------------------------------------------------------------------------------------------------------|-------------|------|----------------|------------|-----------------------------|-------------------------|
|      |          |      |            |                |            |              |            | HYAL3,<br>NAT6,<br>HYAL1,<br>HYAL2,<br>TUSC2,<br>RASSF1<br>,<br>ZMYND10,<br>NPRL2,<br>CYB561D2,<br>TMEM115,<br>CACNA2D2,<br>C3orf18,<br>HEMK1,<br>CISH,<br>MAPKAPK3,<br>MIR4787<br>,<br>DOCK3,<br>MANF,<br>RBM15B<br>,<br>VPRBP,<br>RAD54L2,<br>TEX264,<br>GRM2,<br>IQCF6,<br>IQCF4,<br>IQCF3,<br>IQCF2,<br>IQCF5,<br>IQCF1,<br>RRP9,<br>PARP3,<br>GPR62,<br>PCBP4,<br>ABHD14B, |                    | RNF123<br>(614472)<br>,<br>IP6K1<br>(606991)<br>,<br>UBA7<br>(191325)<br>,<br>TRAI<br>P<br>(605958)<br>,<br>CAMKV<br>(614993)<br>,<br>MST1R<br>(600168)<br>,<br>MON1A<br>(611464)<br>,<br>RBM6<br>(606886)<br>,<br>RBM5<br>(606884)<br>,<br>SEMA3F<br>(601124)<br>,<br>GNAT1<br>(139330)<br>,<br>SLC38A3<br>(604437)<br>,<br>GNAI2<br>(139360)<br>,<br>SEMA3B<br>(601281)<br>,<br>IFRD2<br>(602725)<br>,<br>HYAL3<br>(604038)<br>,<br>NAT6<br>(607073)<br>,<br>HYAL1<br>(607071)<br>,<br>HYAL2<br>(603551)<br>,<br>TUSC2<br>(607052) |             |      |                |            |                             |                         |

| File | CN State | Type | Chromosome | Cytoband Start | Size (kbp) | Marker Count | Gene Count | Genes                                                                                                                                                                                                                                                                                                                                                                                                        | OMIM ® Genes Count | OMIM ® Genes                                                                                                                                                                                                                                                                                                                                                                                                                     | CytoRegions | Call | Interpretation | Curator By | Materially Modified Segment | Microarray Nomenclature |
|------|----------|------|------------|----------------|------------|--------------|------------|--------------------------------------------------------------------------------------------------------------------------------------------------------------------------------------------------------------------------------------------------------------------------------------------------------------------------------------------------------------------------------------------------------------|--------------------|----------------------------------------------------------------------------------------------------------------------------------------------------------------------------------------------------------------------------------------------------------------------------------------------------------------------------------------------------------------------------------------------------------------------------------|-------------|------|----------------|------------|-----------------------------|-------------------------|
|      |          |      |            |                |            |              |            | B,<br>ABHD14<br>A,<br>ABHD14<br>A-ACY1,<br>ACY1,<br>RPL29,<br>DUSP7,<br>LINC006<br>96,<br>POC1A,<br>ALAS1,<br>TLR9,<br>TWF2,<br>PPM1M,<br>WDR82,<br>MIRLET<br>7G,<br>GLYCTK<br>,<br>MIR135<br>A1,<br>DNAH1,<br>BAP1,<br>PHF7,<br>SEMA3<br>G,<br>TNNC1,<br>NISCH,<br>STAB1,<br>NT5DC2<br>, SMIM4,<br>PBRM1,<br>GNL3,<br>SNORD<br>19,<br>SNORD<br>19B,<br>SNORD<br>69,<br>GLT8D1,<br>SPCS1,<br>NEK4,<br>ITIH1, |                    | (607052)<br>,<br>RASSF1<br>(605082)<br>,<br>ZMYND1<br>0<br>(607070)<br>, NPRL2<br>(607072)<br>,<br>CYB561<br>D2<br>(607068)<br>,<br>TMEM11<br>5<br>(607069)<br>,<br>CACNA2<br>D2<br>(607082)<br>, CISH<br>(602441)<br>,<br>MAPKA<br>PK3<br>(602130)<br>, DOCK3<br>(603123)<br>, MANF<br>(601916)<br>,<br>RBM15B<br>(612602)<br>, GRM2<br>(604099)<br>, PARP3<br>(607726)<br>, GPR62<br>(606917)<br>, PCBP4<br>(608503)<br>, ACY1 |             |      |                |            |                             |                         |

| File | CN State | Type | Chromosome | Cytoband Start | Size (kbp) | Marker Count | Gene Count | Genes                                                                           | OMIM ® Genes Count | OMIM ® Genes                                                                                                                                                                                                                                                                                                                                                                                                                                                                            | CytoRegions | Call | Interpretation | Curator By | Materially Modified Segment | Microarray Nomenclature |
|------|----------|------|------------|----------------|------------|--------------|------------|---------------------------------------------------------------------------------|--------------------|-----------------------------------------------------------------------------------------------------------------------------------------------------------------------------------------------------------------------------------------------------------------------------------------------------------------------------------------------------------------------------------------------------------------------------------------------------------------------------------------|-------------|------|----------------|------------|-----------------------------|-------------------------|
|      |          |      |            |                |            |              |            | ITIH1,<br>ITIH3,<br>ITIH4,<br>MUSTN1<br>,<br>TMEM110-<br>MUSTN1<br>,<br>TMEM110 |                    | , ACY1<br>(104620)<br>, RPL29<br>(601832)<br>, DUSP7<br>(602749)<br>, POC1A<br>(614783)<br>, ALAS1<br>(125290)<br>, TLR9<br>(605474)<br>, TWF2<br>(607433)<br>, PPM1M<br>(608979)<br>, WDR82<br>(611059)<br>,<br>MIRLET7G<br>(612102)<br>,<br>GLYCTK<br>(610516)<br>, DNAH1<br>(603332)<br>, BAP1<br>(603089)<br>, TNNC1<br>(191040)<br>, STAB1<br>(608560)<br>, PBRM1<br>(606083)<br>, GNL3<br>(608011)<br>, SPCS1<br>(610358)<br>, NEK4<br>(601959)<br>, ITIH1<br>(147270)<br>, ITIH3 |             |      |                |            |                             |                         |

| File | CN State | Type | Chromosome | Cytoband Start | Size (kb) | Marker Count | Gene Count | Genes | OMIM® Genes Count | OMIM® Genes                          | CytoRegions | Call | Interpretation | Curator By | Materially Modified Segment | Microarray Nomenclature |
|------|----------|------|------------|----------------|-----------|--------------|------------|-------|-------------------|--------------------------------------|-------------|------|----------------|------------|-----------------------------|-------------------------|
|      |          |      |            |                |           |              |            |       |                   | , ITIH3 (146650)<br>, ITIH4 (600564) |             |      |                |            |                             |                         |
